1 **Unbiased identification of *trans* regulators of ADAR and A-to-I RNA editing**

2

3 Emily C. Freund<sup>1</sup>, Anne L. Sapiro<sup>1</sup>, Qin Li<sup>1</sup>, Sandra Linder<sup>1</sup>, James J. Moresco<sup>2</sup>, John R. Yates  
4 III<sup>2</sup>, Jin Billy Li<sup>1</sup>

5

6 <sup>1</sup> Department of Genetics, Stanford University, Stanford, CA, USA

7 <sup>2</sup> Department of Molecular Medicine, 10550 North Torrey Pines Road, SR302, The Scripps  
8 Research Institute, La Jolla, California 92037

9

10 Correspondence: [jin.billy.li@stanford.edu](mailto:jin.billy.li@stanford.edu)

11

12

13 **Abstract**

14 Adenosine-to-Inosine RNA editing is catalyzed by ADAR enzymes that deaminate adenosine to  
15 inosine. While many RNA editing sites are known, few *trans* regulators have been identified. We  
16 perform BioID followed by mass-spectrometry to identify *trans* regulators of ADAR1 and ADAR2  
17 in HeLa and M17 neuroblastoma cells. We identify known and novel ADAR-interacting proteins.  
18 Using ENCODE data we validate and characterize a subset of the novel interactors as global or  
19 site-specific RNA editing regulators. Our set of novel *trans* regulators includes all four members  
20 of the DZF-domain-containing family of proteins: ILF3, ILF2, STRBP, and ZFR. We show that  
21 these proteins interact with each ADAR and modulate RNA editing levels. We find ILF3 is a  
22 global negative regulator of editing. This work demonstrates the broad roles RNA binding  
23 proteins play in regulating editing levels and establishes DZF-domain containing proteins as a  
24 group of highly influential RNA editing regulators.

25

## 26 Introduction

27  
28 RNA editing is a widely conserved and pervasive method of mRNA modification in which the  
29 sequence of a mRNA is altered from that encoded by the DNA (Nishikura, 2016; Walkley and Li,  
30 2017). In mammals, the most prevalent type of RNA editing is Adenosine-to-Inosine (A-to-I)  
31 RNA editing (Eisenberg and Levanon, 2018). After editing occurs, inosine is recognized by the  
32 cellular machinery as guanosine (G); therefore, the editing of a nucleotide can have a variety of  
33 effects, including altering RNA processing, changing splice sites, and expanding the coding  
34 capacity of the genome (Burns et al., 1997; Nishikura, 2010; Rueter et al., 1999). A-to-I editing  
35 is catalyzed by adenosine deaminase acting on RNA (ADAR) proteins, which are conserved in  
36 metazoans (Nishikura, 2016).

37 Humans have two catalytically active ADAR proteins, ADAR1 and ADAR2, that together are  
38 responsible for millions of RNA editing events across the transcriptome. ADAR1 primarily edits  
39 long, near-perfect double-stranded RNA regions that are formed by inverted repeats,  
40 predominantly *Alu* elements (Athanasiadis et al., 2004; Bazak et al., 2014; Blow et al., 2004;  
41 Levanon et al., 2004). These editing events have been shown to play a role in self versus non-  
42 self RNA recognition in the innate immune response, and thus dysregulation of ADAR1 leads to  
43 immune-related diseases such as Aicardi-Goutieres syndrome (AGS) (Blango and Bass, 2016;  
44 Liddicoat et al., 2015; Mannion et al., 2014; Pestal et al., 2015; Rice et al., 2012). ADAR1 levels  
45 also correlate with tumor aggressiveness, as increases in ADAR1 editing suppress the innate  
46 immune response in tumors; accordingly, ADAR1 ablation helps with cancer therapy (Bhate et  
47 al., 2019; Gannon et al., 2018; Ishizuka et al., 2019; Liu et al., 2019; Nemlich et al., 2018). While  
48 the majority of ADAR1-regulated editing sites are found in repeat regions, ADAR2 is primarily  
49 responsible for editing adenosines found in non-repeat regions, particularly in the brain (Tan et  
50 al., 2017). ADAR2-regulated sites in non-repetitive regions include a number of editing events  
51 that alter the protein-coding sequences of neuronal RNAs, including *GluR2*, which encodes a  
52 glutamate receptor in which RNA editing is necessary for its proper function. Further  
53 demonstrating its important role in neuronal editing, dysregulation of human ADAR2 is  
54 associated with multiple neurological diseases, including amyotrophic lateral sclerosis,  
55 astrocytoma and transient forebrain ischemia (Slotkin and Nishikura, 2013; Tran et al., 2019).  
56 Maintaining RNA editing levels is critical for human health, but how RNA editing levels are  
57 regulated at specific editing sites across tissues and development is poorly understood.

58

59 While RNA sequence and structure are critical determinants of editing levels, studies querying  
60 tissue-specific and developmental-stage-specific editing levels show that the level of editing at  
61 the same editing site can vary greatly between individuals and tissues. These changes do not  
62 always correlate with ADAR mRNA or protein expression, suggesting a complex regulation of  
63 editing events by factors other than ADAR proteins (Sapiro et al., 2019; Tan et al., 2017;  
64 Wahlstedt et al., 2009). Recently, an analysis of proteins with an RNA-binding domain profiled  
65 by ENCODE suggested that RNA-binding proteins play a role in RNA editing regulation. Further,  
66 in mammals, a small number of *trans* regulators of editing have been identified through  
67 functional experiments (Quinones-Valdez et al., 2019). Some of these *trans* regulators of editing  
68 are site-specific, in that they affect editing levels at only a small subset of editing sites. These  
69 include RNA binding proteins such as DHX15, HNRNPA2/B1, RPS14, TDP-43, Drosha and  
70 Ro60 (Garncarz et al., 2013; Quinones-Valdez et al., 2019; Tariq et al., 2013). The recently  
71 identified ADAR binding partners, ELAVL1, DHX9 and SRSF9 have also been shown to affect  
72 the editing level of specific sites (Aktaş et al., 2017; Huang et al., 2018; Shanmugam et al.,  
73 2018; Stellos et al., 2016). In addition to site-specific regulators of editing, Pin1, WWP2 and  
74 AIMP2 have been shown to regulate editing through post-translational modification of the ADAR  
75 proteins (Behm et al., 2017; Marcucci et al., 2011; Tan et al., 2017). However, the complexity of  
76 editing level regulation across millions of editing sites in numerous tissues and developmental  
77 stages suggests that there are likely many other proteins that regulate editing.

78  
79 Here, we take a unique approach to identify novel regulators of the ADAR proteins. We employ  
80 the BioID system, which facilitates the biotinylation and subsequent purification of proteins that  
81 both transiently and stably interact with bait proteins (Roux et al., 2012), to uncover proteins that  
82 interact with ADAR1 and ADAR2 in two human cell lines, HeLa and BE(2)-M17 cells. Together,  
83 these experiments facilitate the identification of 269 ADAR-interacting proteins, 15 of which had  
84 been previously reported, and many of which we further validate using publicly available data.  
85 Interestingly, the top candidates for novel regulators of ADARs represent a family of proteins  
86 that all contain a DZF-domain: ILF3, ILF2, STRBP, and ZFR. These proteins interact with both  
87 ADAR1 and ADAR2 in an RNA-dependent manner. We further characterize ILF3, the top  
88 candidate, and find that it acts as a negative regulator of editing that binds RNA near editing  
89 sites and globally regulates RNA editing levels. Furthermore, we demonstrate that the RNA  
90 binding domains of ILF3 are necessary for its editing regulation. This class of DZF-domain-  
91 containing proteins represents a novel group of RNA editing regulators and demonstrates the

92 utility of the BioID experiment as a tool to systematically identify ADAR-interacting proteins that  
93 regulate RNA editing levels.

94

## 95 **Results**

96

### 97 **ADAR1 and ADAR2 BioID identifies known and novel regulators of RNA editing**

98

99 RNA editing levels are dynamically regulated, but few proteins responsible for this regulation are  
100 known. We set out to identify novel regulators of the ADAR proteins by identifying the proteins  
101 that ADAR1 and ADAR2 interact within the cell. We hypothesized that proteins that transiently  
102 interact with ADAR might compete with or recruit ADAR at only subsets of mRNA loci, making  
103 them good candidates for site-specific regulators of RNA editing. To identify these proteins, we  
104 utilized the BioID system (Roux et al., 2012). This method expands upon traditional  
105 immunoprecipitation (IP) and mass-spectrometry-based screening used to identify protein-  
106 protein interactions. Traditional IPs enrich for proteins that form a stable complex with the bait  
107 protein but are less effective at identifying transient interactions. The BioID protocol efficiently  
108 captures both this transiently interacting class of regulators and the more standard stable  
109 protein partners by covalently labeling factors as they come into close proximity (~10 nm) with a  
110 bait protein (Kim et al., 2014). These labeled proteins can then be immunoprecipitated and  
111 identified by mass-spectrometry (**Figure 1A**). To utilize this system, we fused ADAR proteins  
112 with a mutated form of the BirA biotin ligase (R118G), denoted BirA\* (Kwon et al., 2000; Roux et  
113 al., 2012), which promiscuously and irreversibly biotinylates proteins in a proximity-dependent  
114 manner.

115

116 We lentivirally integrated either BirA\*-ADAR1 or BirA\*-ADAR2 constructs into two human cell  
117 lines, neuroblastoma BE(2)-M17 (M17) cells and HeLa cells. By using two cell lines, we hoped  
118 to identify both tissue-specific and universal editing regulators. To first demonstrate that the  
119 constructs were functional, we assessed editing levels at two editing sites. We observed an  
120 increase in editing at an ADAR1-specific site in *PAICS* upon expression of BirA\*-ADAR1 and an  
121 increase in editing at the ADAR2-specific site in *GRIA2* upon expression of BirA\*-ADAR2  
122 compared to a BirA\*-GFP control (**Figure S1A**), demonstrating that the BirA\*-ADAR constructs  
123 produce functional ADAR proteins.

124

125 After verifying the activity of the BirA\*-ADAR proteins, we performed the BioID experiments. We  
126 produced three biological replicates for both BirA\*-ADAR1 and BirA\*-ADAR2 in both M17 and  
127 HeLa cells, along with three replicates of two different negative controls: nuclear localized BirA\*-  
128 GFP and cells with no transgene and thus no BirA\* expression in each cell line (**Figure 1B**).  
129 The cells were incubated overnight with D-biotin to allow the fusion proteins to biotinylate  
130 interactors. We then performed a stringent denaturing pulldown with streptavidin agarose and  
131 analyzed the elution by mass spectrometry (see **Methods** for details). To identify the putative  
132 ADAR1- and ADAR2-interacting proteins from our list of all proteins returned from the mass-  
133 spectrometry, we determined the fold change in peptide counts for each protein in each BirA\*-  
134 ADAR condition compared to BirA\*-GFP and the no BirA\* controls, then defined hits as those  
135 proteins having at least two-fold enrichment over both of the negative control conditions in at  
136 least two biological replicates (**Figure 1C, S3A**). In total, we identified 269 proteins as putative  
137 interactors of either ADAR1 and/or ADAR2 in HeLa and/or M17 cells. When comparing across  
138 all 4 conditions, we found hits unique to each condition: 26 proteins unique to ADAR1 and 201  
139 unique to ADAR2, 127 proteins unique to HeLa and 118 unique to M17 cells, and 57 proteins  
140 shared across multiple conditions (**Figure 1D, S3B,C**). Supporting the efficacy of this screening  
141 approach, we found many of the proteins previously reported to affect editing or interact with  
142 ADAR proteins. The ADAR-interacting proteins we identified included DHX15, RPS14, and  
143 ELAVL1, which were previously reported to regulate editing at specific sites, and SFPQ,  
144 HNRNPH1 and PTBP1, which are known post-transcriptional regulators of ADARs (Hirose et  
145 al., 2014; Yang et al., 2015). We also identified known ADAR-interacting protein CPSF6 and  
146 proteins involved in L1 Line element retrotransposition that were previously found in a complex  
147 with ADAR1: DHX15, SFPQ, NCL, TUBB, NONO, HSPA8, SF3B1, and HNRNPL (Binothman et  
148 al., 2017; Orecchini et al., 2017). Furthermore, we identified proteins that, like ADAR, bind the  
149 *ACA11* transcript: SF3B1, PARP1, NCL, DDX21 and ILF3 (**Figure 1D, S3C**) (Chu et al., 2012).  
150

151 Overall, we found many more candidates specific to ADAR2 than ADAR1, which is likely due to  
152 the fact that ADAR2-BirA\* was more highly expressed than ADAR1-BirA\*; we found that  
153 overexpressed ADAR2 consistently accumulates to higher protein levels than overexpressed  
154 ADAR1, perhaps reflecting different mechanisms of regulation (data not shown). We also found  
155 a large number of cell-type-specific ADAR interactors (118 M17 versus 127 HeLa hits), which  
156 we hypothesized might be differentially expressed between the two cell types. To determine  
157 whether cell-type-specific interactors were more highly expressed in the cell type in which they  
158 were identified, we measured the expression level of our candidates in each cell line using

159 RNA-seq. We found that candidates specific to M17 cells were more highly expressed in M17  
160 cells than in HeLa cells (as measured by FPKM, Wilcoxon test,  $p < 0.001$ ), but the reverse was  
161 not true, suggesting that differential mRNA expression does not fully explain the specificity of  
162 proteins interacting with ADARs in these two cell types (**Figure S3A,B**).

163

### 164 **Novel ADAR-interacting proteins bind near editing sites to alter editing levels**

165

166 Many proteins found in the BioID screen were RNA binding proteins and RNA processing  
167 enzymes, suggesting enrichment for biologically relevant proteins. We utilized publicly available  
168 RNA-seq data from shRNA knockdowns performed in K562 cells by the ENCODE project  
169 (Sundararaman et al., 2016) to identify whether any of the RNA binding proteins identified in the  
170 BioID altered editing levels. We found that knockdown of 8 of the 19 proteins profiled by  
171 ENCODE resulted in increases or decreases in the editing levels of more than 100 sites, while  
172 the remaining 11 affected a smaller more specific set of sites (**Figure 2A, 2S**). We hypothesized  
173 that RNA-binding proteins that affected editing might bind RNA near editing sites and alter  
174 ADAR binding and therefore editing levels at those sites. To test whether this was true of our 19  
175 candidate interactors, we utilized the publicly available eCLIP-seq data (“A Large-Scale Binding  
176 and Functional Map of Human RNA Binding Proteins | bioRxiv,” n.d.) to identify the RNA binding  
177 sites of the 19 candidates profiled by ENCODE. We determined the proximity of each protein’s  
178 RNA binding sites to known editing sites. Of these 19 candidates, 4 showed evidence of binding  
179 at editing sites (**Figure 2B**) and 9 showed evidence of binding nearby, but not right at, editing  
180 sites (**Figure 2C**). This is consistent with the hypothesis that these RBPs might interfere with or  
181 recruit ADARs to these editing sites. The remaining 6 candidates did not show evidence of  
182 binding near editing sites (**Figure 2D**). Included in this last group is PTBP1, which has been  
183 shown to be a translational regulator of ADAR (Yang et al., 2015); this role may explain why it  
184 physically interacts with ADAR but does not bind near editing sites. For the 13 RBPs that bound  
185 RNA at or near editing sites, we compared the positions of their binding sites to the editing sites  
186 that they regulated to determine whether their knockdown affected editing levels specifically at  
187 the sites that were bound by the proteins. We found a statistical enrichment for 11 of the 13  
188 candidates indicating that they changed editing levels at editing sites near where they bound  
189 RNA, suggesting a direct role in RNA editing (**Figure 2E**). Of those proteins, only U2AF2 and  
190 XRCC6 altered the majority of known editing sites in a single direction (**Figure 2A,E**),  
191 suggesting that RBPs binding at or near editing sites does not necessarily lead to the same  
192 changes in editing levels at every site.

193

194 **DZF-domain-containing proteins interact with ADAR1 and ADAR2 in an RNA-dependent**  
195 **manner**

196

197 One group of proteins that we identified in the BioID were four related proteins, ILF2, ILF3,  
198 STRBP and ZFR, which are the only four human proteins that contain a DZF domain. The DZF  
199 domain (domain associated with zinc fingers) is a poorly understood domain, but it has been  
200 shown to drive protein dimerization and facilitate RNA binding (Castello et al., 2016; Wolkowicz  
201 and Cook, 2012). Two of these DZF-domain-containing proteins, ILF3 and ZFR, were the only  
202 proteins identified as hits in all four BioID conditions (ADAR1- and ADAR2-interactors in both  
203 cell types). ILF3 has been shown previously to interact with ADAR1-p150 in an RNA-dependent  
204 manner in the cytoplasm (Nie et al., 2005). Our results extend its interaction to ADAR-p110, the  
205 isoform we overexpressed in our BioID experiments. Another DZF-domain-containing protein,  
206 STRBP, was identified in three out of four conditions (all except HeLa BirA\*ADAR1) and the  
207 fourth, ILF2, was identified in the M17 BirA\*-ADAR1 condition, strongly implicating DZF-domain-  
208 containing proteins as ADAR-interacting proteins. In addition to a DZF domain, all three proteins  
209 except for ILF2 contain double-stranded RNA binding domains (dsRBDs), similar to ADAR1 and  
210 ADAR2 (**Figure 3A**). ILF3 and STRBP have two dsRBDs, while ZFR has three widely spaced  
211 zinc finger domains, which are thought to mediate interaction with dsRNAs. Intriguingly, ILF3's  
212 dsRBDs have been shown to be structurally similar to those of ADAR2 and to compete for  
213 similar binding sites *in vitro* (Wolkowicz et al 2012). In addition, ILF3 has been shown to  
214 regulate circular RNA biogenesis by binding near the highly edited *Alu* elements (Li et al., 2017).  
215 Because this entire class of proteins was highly enriched in the BioID hit list and had been  
216 previously suggested to interact with ADAR1, we chose to further characterize this class of  
217 proteins to understand their regulation of RNA editing.

218

219 To validate the interaction between ILF3, ZFR, STRBP, and ILF2 and each ADAR protein, we  
220 performed traditional co-IPs in M17 cells. We transduced a FLAG-tagged ADAR1, ADAR2, or  
221 GFP as a negative control, into M17 cells (**Figure S5A, B**) and performed an IP using an  
222 antibody against FLAG. To further determine whether the interaction between each ADAR and  
223 each DZF-domain-containing candidate was dependent on RNA, we treated half of each of the  
224 IPs with RNase A. Whereas FLAG-GFP did not immunoprecipitate any of the four candidates,  
225 FLAG-ADAR1 and FLAG-ADAR2 immunoprecipitated each candidate. In all cases, the  
226 interaction between each candidate and each ADAR was decreased upon addition of RNase A,

227 suggesting that their interaction is at least partially RNA-dependent, and that they do not form a  
228 stable complex off of RNA (**Figure 3B, C**).

229  
230 We also wanted to interrogate the reciprocal condition, the ability of each candidate to  
231 immunoprecipitate each ADAR protein; however, M17 and HeLa cells do not express high  
232 levels of ADAR2, making it difficult to analyze endogenous ADAR2's interaction with each  
233 candidate in these cells. To address this problem, we created an M17 cell line overexpressing  
234 ADAR2 by lentiviral transduction. We then stably expressed a FLAG-tagged version of each  
235 candidate, or FLAG-GFP as a negative control, in the ADAR2-overexpressing M17 cell line  
236 (M17-ADAR2-OE) (**Figure S5C-F**). We performed FLAG IPs with and without RNase A  
237 treatment in this cell line. We used pulldown of ILF2 as a positive control because previous work  
238 established that it binds each of the other DZF-domain-containing proteins in an RNA-  
239 independent manner, and thus we would expect to see that it binds each candidate protein with  
240 and without RNase A (Wolkowicz and Cook, 2012). As expected, ILF2, ILF3, and ZFR all bound  
241 ADAR1 and ADAR2 in an RNA-dependent manner and bound ILF2 independent of RNA  
242 (**Figure 3D-G**). Unexpectedly, in contrast to the FLAG-ADAR2 IP, in the FLAG-STRBP IP we  
243 found an RNA-independent interaction between STRBP with ADAR2 (**Figure 3G**), which could  
244 indicate a different mode of interaction depending on the bait protein. Taken together, we were  
245 able to fully validate that three of our top candidates biochemically interact with ADARs in an  
246 RNA-dependent manner.

247

#### 248 **DZF-domain-containing proteins affect A-to-I RNA editing**

249

250 Similar to the validation of other candidates that we performed with publicly available RNA-seq  
251 and eCLIP-seq data, we wanted to perform a more thorough analysis of the role of DZF-  
252 domain-containing proteins in A-to-I RNA editing. We transiently overexpressed ILF2, ILF3, and  
253 STRBP in HEK293T cells and in HEK293T cells stably overexpressing ADAR2 through lentiviral  
254 transduction (HEK293T-ADAR2-OE) (**Figure 4A, B**); as in M17 cells, ADAR2 is lowly expressed  
255 in HEK293T cells, thus requiring overexpression for analysis of ADAR2-controlled editing sites.  
256 We choose to perform these experiments in HEK293T cells both because in contrast to M17  
257 cells, they were suitable for transient transfection and it extended our findings to a third cell  
258 type. We first verified that each protein was overexpressed at the transcript level (**Figure 4A, B**)  
259 and protein level (**Figure S6A,B**). To examine the effects of the DZF-domain-containing  
260 proteins on editing levels, we used microfluidic multiplex PCR and sequencing (mmPCR-seq), in



261 which we PCR-amplified cDNA at thousands of known editing sites for subsequent Illumina  
262 sequencing [REF]. mmPCR-seq editing level measurements were highly reproducible between  
263 two biological replicates from each cell type (**Figure S7A, Table S1**). We compared the editing  
264 levels at these highly reproducible sites between the GFP-overexpressing control and the cells  
265 overexpressing DZF-domain-containing proteins in both HEK293T and HEK293T-ADAR2-OE  
266 backgrounds. Overexpression of ILF2 had a moderate effect in both HEK293T and HEK293T-  
267 ADAR2-OE cells (**Figure 4C, D**); 11 sites had reduced editing in HEK293T cells, while 15 sites  
268 showed increased editing, and 18 sites showed reduced editing in HEK293T-ADAR2-OE cells.  
269 This relatively weak and bidirectional effect on editing is consistent with ILF2's identification in  
270 only one of the four BioID conditions (interacting with ADAR1 in M17 cells), suggesting that on  
271 its own it may not be a robust ADAR interactor. STRBP demonstrated a slightly stronger effect;  
272 19 sites were reduced in HEK293T cells and 27 in HEK293T-ADAR2-OE cells with only 7 and 3  
273 sites increased in editing respectively (**Figure 4E, F**). By far, ILF3 demonstrated the strongest  
274 effect; 39 sites were decreased in HEK293T cells and 47 in HEK293T-ADAR2-OE cells with  
275 only 4 and 1 editing sites showing increased editing levels, respectively (**Figure 4G, H**). To  
276 better understand the role of ILF3 in editing regulation, we performed RNA-seq on cells with  
277 ILF3 overexpression in both HEK293T and HEK293T-ADAR2-OE backgrounds. Similar to  
278 mmPCR-seq, editing level measurements were highly reproducible between two biological  
279 replicates from each cell type (**Figures S7B, Table S2**). This more expansive genome-wide  
280 analysis further revealed ILF3 to be a global regulator of editing, as almost the entire editing  
281 landscape was reduced when ILF3 was overexpressed. We observed 221 sites with a  
282 significantly reduced editing level ( $p < 0.05$ , Fisher's exact test) compared to only 16 with an  
283 increased editing level in HEK293T cells, and we found 237 sites with a significantly reduced  
284 editing level compared to only 2 with an increased editing level in HEK293T-ADAR2-OE cells  
285 (**Figure 4I**). In addition, we calculated overall editing as the total number of edited G reads over  
286 the total of A + G reads at all known editing sites combined as a global measure of ADAR  
287 activity (Tan et al 2017). We found that in both HEK293T and HEK293T-ADAR2-OE cells,  
288 overall editing was significantly reduced, from 2.43% to 1.45% in HEK293T cells, and from  
289 4.56% to 2.45% in HEK293T-ADAR2-OE cells (**Figure 4J**). Overall, our data show that ILF3  
290 and STRBP are both negative regulators of editing but that ILF3 is a stronger global regulator of  
291 editing.

292

293 One possible explanation for the effect of DZF-domain-containing proteins on RNA editing could  
294 be transcriptional or translational regulation of ADAR mRNA or protein levels. To test this

295 hypothesis, we analyzed the mRNA and protein levels of ADAR1 and ADAR2 in ILF2-, ILF3-,  
296 and STRBP-overexpressing cells compared to GFP-overexpressing cells in HEK293T and  
297 HEK293T-ADAR2-OE cells. We found that ADAR1 mRNA and protein levels were largely  
298 unchanged (**Figure S7A, B**). *ADAR2* transcript levels were reduced, which may account for  
299 some of the editing effects in HEK293T-ADAR2-OE cells (**Figure S8A, B**); however, there was  
300 a reduction in editing even in HEK293T cells, which largely lack ADAR2 expression and ILF2  
301 overexpression showed a similar reduction in ADAR2 protein without a strong effect on editing,  
302 suggesting regulation of ADAR2 levels cannot be the sole mechanism that DZF-domain-  
303 containing proteins use to repress editing.

304

### 305 **RNA binding activity of ILF3 is necessary for its regulation of RNA editing**

306

307 Because changes in ADAR levels did not explain the differences in editing that we observed, we  
308 hypothesized that the global regulator ILF3 and ADAR proteins compete for the same  
309 transcripts. This hypothesis is supported by previous work showing that ILF3 has structurally  
310 similar dsRBDs to ADAR2 (Wolkowicz and Cook, 2012). This mechanism would be consistent  
311 with our previously observed RNA-dependent interaction between ILF3 and the ADARs. In  
312 addition, we and others have shown that ILF3 binds near editing sites in K562 cells (**Figure 2B**)  
313 (Quinones-Valdez et al., 2019). If ILF3 competes for RNA binding sites with ADAR proteins,  
314 then the ability of ILF3 to affect editing levels would be dependent on its ability to bind RNA. To  
315 test this hypothesis, we overexpressed a FLAG-tagged mutant of ILF3 that lacks its two  
316 dsRBDs ( $\Delta 402-572$ ) in HEK293T and HEK293T-ADAR2-OE cells (**Figure 5A, B, S9A, Table**  
317 **S1**). In both cases, ILF3- $\Delta$ dsRBD-OE did not induce a global reduction in editing (**Figure 5C,**  
318 **S9B**), suggesting that ILF3's RNA binding ability is necessary for its regulation of editing levels.  
319 In addition, we performed a FLAG IP to pull down the mutant and wild-type version of ILF3 and  
320 found that only wild-type ILF3 interacts with ADAR1 and ADAR2 (**Figure 5D**). This result further  
321 supports the hypothesis that it is the ability of ILF3 to bind RNA and compete for substrates with  
322 ADARs that regulates editing levels.

323

### 324 **Discussion**

325

326 RNA editing is widely conserved and pervasive, leading to changes at the RNA level. It is  
327 catalyzed by two enzymatically active ADARs, ADAR1 and ADAR2. Expression levels of these  
328 ADAR enzymes do not correlate with the editing frequency of large classes of sites (Tan et al.,

2017), which strongly suggests the presence of additional editing regulators. We performed a large-scale, unbiased assay to systematically identify novel editing regulators in humans by employing a biochemical-based screening approach, BioID. BioID labels proteins in proximity of a BirA\*-tagged bait protein, thus allowing us to identify proteins that physically interact with ADARs transiently or stably. As editing regulation is known to be cell-type-specific, we performed the BioID screen in two different cell types, HeLa and M17, using either ADAR1 or ADAR2 as bait. This approach was highly successful in enriching for ADAR interactors, in that it identified most previously known ADAR binding partners and editing regulators. The small number of previously known ADAR-interactors that were not found here probably interact with ADAR proteins in a cell-type-specific context that may not exist in our system. While many proteins were found in multiple BioID conditions, supporting the reproducibility and robustness of this approach, we also uncovered numerous cell-type-specific and ADAR1- or ADAR2-specific interactors. Cell-type-specific hits may arise from differences in expression of those proteins between cell types, however a similar explanation would not explain ADAR-specific hits. We cannot rule out that some of the proteins specific to each condition may be an artifact of the common variability seen in mass-spectrometry-based screens; however, the reproducibility of the data suggests strong biological signals in the dataset. This dataset is highly complementary to and greatly extends a recently published study of RNA editing regulators identified through analysis of the ENCODE RNA binding protein knockdown RNA-seq dataset (Quinones-Valdez et al., 2019). We have uncovered 269 proteins that interact with ADARs, many of which overlap with the recently identified RNA binding proteins that regulate editing, validating our approach. Our biochemical screen enabled us to identify additional regulators, many of which are potentially ADAR and cell-type-specific.

When we first set out to identify *trans* regulators of editing, we were investigating two major potential mechanisms that could account for the observed tissue-specific differences in editing. *Trans* regulators could act directly on ADAR proteins to modify their activity at all sites equally but be differentially expressed in different tissues. Alternatively, *trans* regulators could affect a subset of sites by only interacting with or regulating ADAR proteins at those sites. We used publicly available RNA-seq and eCLIP-seq data from the ENCODE project to determine that we had uncovered both global and site-specific RNA editing regulators. Specifically, we found that the majority of our hits profiled by the ENCODE project showed binding at or near editing sites, and knocking down those proteins resulted in changes in the editing levels specifically at the sites they bound. This finding suggests that many of the editing sites regulated in *trans* are

363 controlled by proteins interacting with ADAR proteins at editing sites. In some cases, the  
364 primary function may not be to regulate editing, but they nevertheless alter ADAR binding and  
365 editing. For example, BioID recovered many of the proteins found in paraspeckles, a complex  
366 ADAR1 had previously been found to be associated with (Anantharaman et al., 2016),  
367 highlighting the power of BioID to identify nearly all proteins found in a complex. We also found  
368 proteins that are ADAR interactors but not regulators of editing. These proteins may help ADAR  
369 proteins perform their other known functions in the cell such as miRNA regulation, or as yet  
370 unknown editing-independent functions of ADARs. They may also regulate the translation of  
371 ADARs, similar to PTBP1, which can activate the translation of ADAR-p110 through an IRES-  
372 like element (Yang et al., 2015).

373

374 The most intriguing finding of the BioID screens was the identification of all four DZF-domain  
375 containing proteins among the strongest hits. This finding suggests the importance of this class  
376 of proteins as ADAR interactors. These proteins largely interact with ADARs in an RNA-  
377 dependent fashion. ILF3 and STRBP appear to compete with ADAR to bind and edit dsRNAs  
378 because overexpression of these proteins led to decreased editing overall. In particular, ILF3  
379 inhibited editing at a large number of sites, suggesting that it is a strong global suppressor of  
380 editing. This finding is consistent with a recent report that knockdown of ILF3 decreases editing  
381 at specific sites in K562 cells (Quinones-Valdez et al., 2019). Because ILF3 and ADAR2 have  
382 structurally similar dsRBDs and are able to compete for substrates in a biochemical assay  
383 (Wolkowicz and Cook, 2012) we tested whether this mechanism held in cells. We  
384 overexpressed a mutant version of ILF3 that lacks both dsRNA binding domains and found that  
385 the mutant did not interact with either ADAR and was unable to suppress editing. As we found  
386 that a number of RNA binding proteins bound RNA near the editing sites that they regulated, we  
387 further hypothesize that competing with ADAR for RNA binding is a prominent regulatory  
388 mechanism of RNA binding proteins on editing levels.

389

390 It will be interesting to more thoroughly explore the role of the other DZF domain containing  
391 proteins, ZFR and STRBP, in interacting with ADARs and regulating editing. The companion  
392 paper from our lab shows that Zinc finger RNA binding protein Zn72D, the fly homolog of ZFR,  
393 regulates over half of editing events in the fly brain, and that knockdown of ZFR leads to a  
394 decrease in a large number of editing events in mouse primary neurons. Zn72D also interacts  
395 with dADAR in an RNA-dependent manner, suggesting a similar mechanism to ILF3 regulation  
396 of ADARs that we detail here, but ZFR appears to be a positive regulator of editing, in contrast

397 to ILF3. ZFR regulates editing of primarily ADAR2 editing sites in mouse primary neurons,  
398 suggesting that ZFR may be a particularly important regulator of ADAR2 editing in the brain  
399 (Sapiro et al., n.d.). Future work may explore whether STRBP has a similarly strong tissue-  
400 specific effect on editing, as it is highly expressed in the brain and testes. Together, our work  
401 suggests that DZF-domain-containing proteins as a class are critical for proper RNA editing, and  
402 future work is needed to further explore the mechanistic details and cell-type specificity of this  
403 role, including the potential role of the actual DZF-domain in supporting a protein interaction with  
404 ADAR.

405

406 The BioID experiments uncovered a large number of novel ADAR interactors and putative RNA  
407 editing regulators. These hits can be further characterized for their roles in both RNA editing  
408 and/or non-canonical roles for ADAR in the cell. Such knowledge may enable the manipulation  
409 of editing levels at specific sites without the manipulation of ADAR proteins themselves, which  
410 may have therapeutic benefit for cancer, autoimmune diseases, neurological diseases, or other  
411 diseases in which ADARs play a role.

412

## 413 **Methods**

414

### 415 **Cell Culture, Transfections and Viral Transductions**

416 HeLA S3 and 293T cells were cultured in DMEM supplemented with 10% FBS and Pen/Strep.  
417 M17 cells were cultured in F12 media supplemented with 10% FBS and Penn/Strep. Lentivirus  
418 was generated using standard methods: briefly, 293T cells were transfected with 3<sup>rd</sup> generation  
419 packaging constructs and target plasmid for 8 hours then media was changed and viral  
420 supernatant was collected at 24 and 48 hour after and filtered at .45 uM. Cells were transduced  
421 with 1X viral supernatants supplemented with 5 ug/ml polybrene. Media was changed 12-24  
422 hours later and selection began with the appropriate antibiotics between days 3-7.

423

424 BirA\* constructs (BirA\*-ADAR1, BirA\*-ADAR2, BirA\*-GFP) were created by subcloning the  
425 cDNA for each gene into the pCDH backbone containing a 3XFLAG tag, a nuclear localization  
426 sequence and the BirA\* cDNA sequence upstream of the target gene, resulting in 3xFLAG-NLS-  
427 BirA\*-ADAR1, 3xFLAG-NLS-BirA\*-ADAR2, and 3xFLAG-NLS-BirA\*-GFP constructs and, when  
428 translated, fusion proteins. These constructs were used to generate lentivirus, as described  
429 above.

430

431 FLAG-tagged constructs for ADARs (ADAR1 and ADAR2) and DZF-domain-containing proteins  
432 (ILF2, ILF3, STRBP, ZFR) were generated by subcloning the cDNA for each gene into the  
433 pCDH backbone containing an upstream (N-terminal) 3xFLAG. These constructs were used to  
434 generate lentivirus, as described above.

435

436 A non-tagged version of ADAR2 (for Figure 3) was generated by subcloning the ADAR2 cDNA  
437 into the pCDH backbone.

438

439 All transient transfection constructs were generated by subcloning the cDNA of interest into the  
440 pCDNA 3.1-3xFLAG (GFP, ADAR1, ADAR2, ILF2, ILF3, STRBP). All transient transfections  
441 were performed with Lipofectamine 2000 according to manufacturer's protocol.

442

443 ILF3 ΔdsRBD was generated by synthesizing an ILF3 cDNA lacking the nucleotides coding for  
444 amino acids 402-572 (inclusive) and subcloning it into pCDNA 3.1-3xFLAG and pCDH.

445

### 446 **Bioid Experimental Procedure**

447 Each of the three (ADAR1, ADAR2, and GFP) BirA constructs were stably expressed in HeLa  
448 and M17 cells via lentiviral transduction. Ten 150mm plates of confluent cells expressing each  
449 construct were grown overnight in media with a final concentration of 50 uM D-Biotin (Life  
450 technologies, B-20656).

451

#### 452 **Nuclear Lysate Preparation**

453 Cells were harvested, pelleted and washed once with 1 X PBS. A 10X pellet volume of ice cold  
454 cytoplasmic extraction buffer (10 mM Hepes pH 7.5, 10 mM KCL, 1.5 mM MgCl<sub>2</sub>, 0.34 M  
455 Sucrose, 10% glycerol) with 1 mM DTT and protease inhibitors (cOmplete, Mini, EDTA-free  
456 Protease Inhibitor Cocktail Tablets, # 4693159001) was added and the pellet was gently  
457 resuspended. Cells were incubated on ice for 15 min. Triton X-100 was added to a final  
458 concentration of 0.1% and cells were vortexed for 10 seconds then incubated on ice for 5 min.  
459 Cells were spun down at 1300xg for 5 min at 4C, and washed once with cytoplasmic extraction  
460 buffer, spun down again and the supernatant was discarded. The nuclei were lysed with 7X the  
461 volume of the original pellet with high salt NP-40 lysis buffer (25 mM Hepes pH 7.5, 420 mM  
462 NaCl, 1.5 mM MgCl<sub>2</sub>, 10% glycerol, 0.5% NP-40) and incubated on ice for 20 min with  
463 occasional vortexing. Lysate was then spun at >20,000xg for 15 min at 4C. Protein  
464 concentration was then measured by BCA (Pierce, 23227).

465

#### 466 **Preclear Lysate**

467 1 mL of Agarose Control Resin (Pierce, 26150) slurry was added per sample to a 10 mL  
468 centrifuge column (Pierce, 89898) and placed inside a 50 mL conical tube and spun at 1000xg  
469 for 1 min to remove storage buffer. The resin was washed once with 4X resin bed volume of  
470 high salt NP-40 lysis buffer, and spun at 1000xg for 1 min. Nuclear lysate was added to the  
471 washed resin and incubated at 4C for >2hrs, with rotation. The resin was placed in a new 50 mL  
472 conical, and spin at 1000xg for 1 min to collect the precleared lysate. The protein concentration  
473 is measured by BCA (Pierce, 23227).

474

#### 475 **Bind Biotinylated targets to Streptavidin beads**

476 20 uL of High Capacity Streptavidin Agarose (Pierce, 20359) per 1 mg of lysate is added to a 10  
477 ml centrifuge column placed inside a 50 mL conical tube. 6 volumes of high salt NP-40 lysis  
478 buffer is added to column and allowed to drain by gravity flow. Nuclear lysate is added to  
479 washed resin and incubated at 4 °C overnight, with rotation.

480

## 481 **Washing and Eluting**

482 Eluate was collected by gravity flow and retained as the depleted fraction. The resin was then  
483 stringently washed twice with 10X volumes of the resin bed volume of high salt NP-40 lysis  
484 buffer with 0.3% SDS and then twice with high salt NP-40 lysis buffer with 1.0% SDS. The  
485 washed resin was resuspended in 900 ul of elution buffer (1XPBS, 5% SDS, 10 mM D-Biotin  
486 (Life technologies, B-20656), transferred to an eppendorf tube and boiled for 15 min. The resin  
487 is then placed in a 2 mL centrifuge column (Pierce, 89896) placed inside a 15 mL conical tube  
488 and spun at 1000xg for 1 min to collect the eluate. MeOH/Chloroform precipitation was used to  
489 concentrate the eluate. In brief, to 150  $\mu$ L of eluate 600  $\mu$ L of methanol was added followed by  
490 150  $\mu$ L of chloroform and vortexed. 450  $\mu$ L of ultrapure water was added and vortexed  
491 then centrifuged at 14,000 xg for 5 min. Upper aqueous phase was removed and 450  $\mu$ L of  
492 methanol, 1  $\mu$ L GlycoBlue was added and vortexed. The protein was pelleted by centrifuging at  
493 14,000xg for 5 min and then methanol removed completely. Pellets were resuspended in 25 ul  
494 of 1x SDS-PAGE sample buffer then boiled at 95C for 5 min.

495

## 496 **BioID Mass Spectrometry and Analysis**

### 497 ***Reagents and Chemicals***

498 Deionized water was used for all preparations. Buffer A consists of 5% acetonitrile 0.1% formic  
499 acid, buffer B consists of 80% acetonitrile 0.1% formic acid, and buffer C consists of 500 mM  
500 ammonium acetate 0.1% formic acid and 5% acetonitrile.

### 501 ***Sample Preparation***

502 Proteins were precipitated in 23% TCA (Sigma-Aldrich, St. Louis, MO, Product number T-0699)  
503 at 4 °C O/N. After 30 min centrifugation at 18000xg, protein pellets were washed 2 times with 500  
504 ul ice-cold acetone. Air-dried pellets were dissolved in 8 M urea/ 100 mM Tris pH 8.5. Proteins  
505 were reduced with 5 mM Tris(2-carboxyethyl)phosphine hydrochloride (Sigma-Aldrich, St. Louis,  
506 MO, product C4706) and alkylated with 55 mM iodoacetamide (Sigma-Aldrich, St. Louis, MO,  
507 product I11490). Proteins were digested for 18 hr at 37 °C in 2 M urea 100 mM Tris pH 8.5, 1 mM  
508 CaCl<sub>2</sub> with 2 ug trypsin (Promega, Madison, WI, product V5111). Digest was stopped with formic  
509 acid, 5% final concentration. Debris was removed by centrifugation, 30 min 18000xg.

### 510 ***MudPIT Microcolumn***

511 A MudPIT microcolumn(4) was prepared by first creating a Kasil frit at one end of an  
512 undeactivated 250  $\mu$ m ID/360  $\mu$ m OD capillary (Agilent Technologies, Inc., Santa Clara, CA).  
513 The Kasil frit was prepared by briefly dipping a 20 - 30 cm capillary in well-mixed 300  $\mu$ L Kasil  
514 1624 (PQ Corporation, Malvern, PA) and 100  $\mu$ L formamide, curing at 100°C for 4 hrs, and cutting



515 the frit to ~2 mm in length. Strong cation exchange particles (SCX Luna, 5  $\mu$ m dia., 125 Å pores,  
516 Phenomenex, Torrance, CA) was packed in-house from particle slurries in methanol 2.5 cm. An  
517 additional 2.5 cm reversed phase particles (C18 Aqua, 3  $\mu$ m dia., 125 Å pores, Phenomenex)  
518 were then similarly packed into the capillary using the same method as SCX loading, to create a  
519 biphasic column. An analytical RPLC column was generated by pulling a 100  $\mu$ m ID/360  $\mu$ m OD  
520 capillary (Polymicro Technologies, Inc, Phoenix, AZ) to 5  $\mu$ m ID tip. Reversed phase particles  
521 (Aqua C18, 3  $\mu$ m dia., 125 Å pores, Phenomenex, Torrance, CA) were packed directly into the  
522 pulled column at 800 psi until 12 cm long. The MudPIT microcolumn was connected to an  
523 analytical column using a zero-dead volume union (Upchurch Scientific (IDEX Health & Science),  
524 P-720-01, Oak Harbor, WA).

525

526 LC-MS/MS analysis was performed using an Eksigent nano lc pump and a Thermo LTQ-Orbitrap  
527 using an in-house built electrospray stage. MudPIT experiments were performed where each  
528 step corresponds to 0, 20, 50 and 100% buffer C being run for 3 min at the beginning of each  
529 gradient of buffer B. Electrospray was performed directly from the analytical column by applying  
530 the ESI voltage at a tee (150  $\mu$ m ID, Upchurch Scientific). Electrospray directly from the LC  
531 column was done at 2.5 kV with an inlet capillary temperature of 275 °C. Data-dependent  
532 acquisition of MS/MS spectra with the LTQ -Orbitrap were performed with the following settings:  
533 MS/MS on the 10 most intense ions per precursor scan, 1 microscan, reject charge unassigned  
534 charge state; dynamic exclusion repeat count, 1, repeat duration, 30 second; exclusion list size  
535 200; and exclusion duration, 15 second.

### 536 ***Data Analysis***

537 Protein and peptide identification and protein quantitation were done with Integrated Proteomics  
538 Pipeline - IP2 (Integrated Proteomics Applications, Inc., San Diego, CA.  
539 <http://www.integratedproteomics.com/>). Tandem mass spectra were extracted from raw files  
540 using RawExtract 1.9.9(1) and were searched against Uniprot human database with reversed  
541 sequences using ProLuCID(2, 5). The search space included half- and fully-tryptic peptide  
542 candidates. Carbamidomethylation (+57.02146) of cysteine was considered as a static  
543 modification. Biotinylation of lysine (226.077598) was considered as a variable modification,  
544 Peptide candidates were filtered using DTASelect, with these parameters -p 2 -y 2 --trypstat --pfp  
545 0.01 --extra --pl -DM 10 --DB --dm -in -m 1 -t 1 --brief --quiet (1, 3).

546

### 547 **Analysis of BiOLD hits**

548 BirA\*-ADAR1 and BirA\*-ADAR2 experiments were analyzed separately. In both cases, peptide  
549 counts were summed to generate protein-level counts. For each biological replicate, the fold  
550 change of the ADAR condition vs the no-BirA\* and GFP conditions were separately calculated  
551 (1 was added to all counts in order to avoid infinite fold changes). Proteins were then filtered  
552 according to the following criteria: for each replicate, in order to be retained, a protein was  
553 required to have a fold change >2 versus both the no-BirA\* and GFP conditions. A second level  
554 of filtering then required each protein to be retained in at least 2 out of the 3 biological  
555 replicates. These retained proteins were considered hits for that condition. For heatmaps, log<sub>2</sub>  
556 fold change for the ADAR condition was calculated by determining the median log<sub>2</sub> fold change  
557 versus the GFP condition across all three replicates.

558

### 559 **Immunoprecipitation**

560 FLAG-tagged proteins were immunoprecipitated from 2 mg of HEK293T or M17 cells using anti-  
561 FLAG M2 affinity gel (Sigma A2220). Lysates were prepared in NP40 buffer (see Western  
562 blotting). 40 ul of the anti-FLAG M2 affinity resin was washed three times with 1 ml of lysis  
563 buffer then added to the 2 mg of protein extract diluted to 500 ul in NP-40 lysis buffer and  
564 incubated for 2 hours at 4°C with rotation. The resin was then washed 4 times for 5 minutes  
565 each with 1 mL NP-40 lysis buffer at 4°C with rotation. For further analysis the resin was  
566 resuspended with 30 ul 2x SDS-PAGE sample buffer, then incubated at 95 degrees for 5 min to  
567 elute bound proteins.

568

### 569 **Western Blotting**

570 Cells were lysed in NP-40 buffer (25 mM HEPES-KOH, 150 mM KCl, 1.5 mM MgCl<sub>2</sub>, 0.5%  
571 NP40, 10% Glycerol [pH 7.5]) supplemented with protease inhibitors (cOmplete, Mini, EDTA-  
572 free Protease Inhibitor Cocktail Tablets, # 4693159001) Lysates were clarified by spinning for  
573 10 min at 13,000 rpm at 4°C, and the protein content was measured by BCA (Pierce, 23225). 10  
574 ug of protein was separated by SDS-PAGE, transferred onto nitrocellulose membrane, and  
575 blotted according to standard protocols. Chemiluminescence was imaged using a BioRad  
576 ChemiDoc imaging system.

577

### 578 **Antibodies**

579 ILF2: Bethyl laboratories NF45 Antibody, cat: A303-147A (1:1000)

580 ILF3: Bethyl laboratories NF90 Antibody, cat: A303-651A (1:1000)

581 ZFR: Abcam Anti-ZFR antibody ab90865 (1:500)

582 STRBP: Abcam Anti-STRBP antibody cat: ab111567 (1:500)  
583 ADAR1: Santa Cruz ADAR1 Antibody (15.8.6) cat: sc-73408 (1:500)  
584 ADAR2: Genetex ADAR2 antibody cat: GTX114237(1:500)  
585 FLAG: Sigma Monoclonal ANTI-FLAG® M2-Peroxidase (HRP) (1:5000)

586

### 587 **mmPCR-seq of samples**

588 The mmPCR-seq was performed as described in (Zhang et al., 2014). Briefly, total RNA is  
589 extracted from cells using a Qiagen Micro or Mini RNeasy kit (Qiagen cat:74004 or 74104) and  
590 reverse transcribed using iScript Advanced reverse transcriptase (Bio-Rad). The cDNAs were  
591 purified using Ampure XP Beads (Beckman Coulter), with an elution volume of 10 ul. 250 ng  
592 of cDNA was used in a preamplification reaction and amplified cDNA was purified using  
593 Ampure XP beads and eluted in 10 ul. 50 ng of pre-amplified cDNA was loaded into each  
594 well of an Access Array microfluidic chip (Fluidigm). The PCR reactions were performed on  
595 the Access Array System (Fluidigm) using KAPA2G 5X Fast Multiplex PCR Mix (Kapa  
596 Biosystems). Barcodes were added in a second round of PCR using Phusion DNA  
597 polymerase (NEB cat: M0531S). Samples were sequenced with 76 base-pair paired-end reads  
598 using an Illumina NextSeq (Illumina, San Diego, CA).

599

### 600 **Analysis of mmPCR-seq and RNA-seq**

601 mmPCR-seq and RNA-seq reads were mapped to the human genome (hg19) using STAR  
602 (Dobin et al., 2013) version 2.4.2a using the parameters (--outFilterMultimapNmax 20 --  
603 outFilterMismatchNmax 999 --outFilterMismatchNoverReadLmax 0.1 --alignIntronMin 20 --  
604 alignIntronMax 1000000 --alignMatesGapMax 1000000 --alignSJoverhangMin 8 --  
605 alignSJDBoverhangMin 1 --sjdbScore 1 --twopassMode Basic). For editing analysis we used the  
606 Samtools (version 0.1.16) (Li et al., 2009) mpileup command to count A and G counts at known  
607 editing sites (Tan et al., 2017), RADAR version 2 (Ramaswami and Li, 2014). For RNA-seq only  
608 bases with quality scores > 20 were used. For both RNA-seq and mmPCR-seq, combined A  
609 and G counts from two replicates of each condition were compared to down sampled GFP  
610 overexpression reads using Fisher's exact test with a Benjamini-Hochberg multiple hypothesis  
611 testing correction in R (Benjamini and Hochberg, 1995).

612

613 For both RNA-seq and mmPCR-seq analysis, any variability between replicates could arise for a  
614 number of reasons, e.g. low expression or inefficient primer-based amplification, so for all

615 subsequent analyses we only assessed sites with high coverage (50X in mmPCR-seq and 20X  
616 in RNA-seq) that were <10% different between replicates (**Figure S6A, B**).

617

618 For gene expression analysis, FPKMs were calculated using RSEM 1.2.21 (Li and Dewey,  
619 2011). To compare global expression differences of cell-type-specific BioID hits in M17 and  
620 HeLa cells, we used Wilcoxon matched-pairs signed ranked test performed by Graphpad  
621 PRISM 7.

622

### 623 **RNA-seq library preparation**

624 Total RNA was extracted from cells using Qiagen Micro or Mini RNeasy kit (Qiagen cat:74004  
625 or 74104). rRNA was depleted from total RNA following RNase H-based protocols adopted from  
626 (Adiconis et al., 2013; Morlan et al., 2012). We mixed approximately 250 ng of RNA with 61.54  
627 pmoles of pooled DNA oligos designed antisense to rRNA (gift from J. Salzman lab at Stanford)  
628 in a 5ul reaction with 1 ul of 5X RNase H(-)Mg buffer (500 mM Tris-HCl pH 7.4, 1 M NaCl) and  
629 0.25 ul 1mM EDTA. We annealed rRNA antisense oligos to total RNA samples for 2 minutes at  
630 95°C, slowly reduced the temperature to 45°C and then added 5 ul of RNase H mix (1.7 ul  
631 water, 1 ul 5X RNase H(-)Mg buffer, 0.2 ul 1 M MgCl<sub>2</sub>, 0.1ul RiboLock RNase Inhibitor (40 U/μL)  
632 (ThermoFisher EO038), 2 ul of Hybridase Thermostable RNase H (Epicenter, Madison, WI:  
633 Lucigen H39500) to make 10 ul total and incubated for 30 minutes at 45°C. rRNA-depleted RNA  
634 was then purified using 2.2X reaction volume of Agencourt RNAClean XP beads (Beckman  
635 Coulter: A63987), treated with TURBO DNase (Invitrogen: AM1907), and then purified with  
636 RNAClean XP beads again. rRNA-depleted RNA was used as input to the KAPA HyperPrep  
637 RNA-seq Kit (Kapa Biosystems: KK8540). All libraries were sequenced with 76 base-pair  
638 paired-end reads using an Illumina NextSeq (Illumina, San Diego, CA).

639

### 640 **Sanger Sequencing of RNA levels**

641 To determine editing levels at PAICS and GRIA2 editing sites, RNA was extracted from M17  
642 cells expressing BirA\*-GFP, BirA\*-ADAR1, and BirA\*-ADAR2 using Zymo Quick RNA kit. RNA  
643 was treated with TURBO DNase and then cDNA was synthesized using Bio-Rad iScript  
644 Advanced cDNA synthesis kit. PCR was performed using the following to amplify around the  
645 editing site in each gene, PAICS FWD: TCAATCCACCCTTTTCCAAG, REV:  
646 TGATAAAAACGTGGGCCTTC and GRIA2 FWD: CAGCAGATTTAGCCCCTACG REV:  
647 AGATGAGATGTGTGCCAACG) with NEB Phusion for 40 cycles, and amplicons were gel

648 purified with Qiagen QIAquick Gel Extraction kit (Cat 28115) and sent for Sanger sequencing.  
649 Two replicates were performed for each group of cells.

650

### 651 **ENCODE data analysis**

652 We downloaded the mapped BAM files (HG38 version) of RNA-seq data generated following  
653 RBP knockdown or control shRNA transfection from the ENCODE data portal  
654 ([encodeproject.org](http://encodeproject.org)). For the RNA-seq data, we used the same pipeline as described in the  
655 Analysis of mmPCR-seq and RNA-seq section to quantify editing levels. Similarly, as reported  
656 (Quinones-Valdez et al., 2019), we also found batch effects in the editing level measurements  
657 from the RNA-seq data. However, in this paper we only performed editing level comparison  
658 between RBP knockdown and the matched control shRNA transfection within the same batch,  
659 so it was not necessary to remove the batch effects that only affected editing level  
660 measurements of samples from different batches. When the accumulative editing level  
661 differences was calculated and compared between different RBPs in **Fig. 2E**, the influence of  
662 batch effects was taken into consideration by normalizing the CDED to [0,1].

663

664 To determine where the RBPs bind on the RNA, we analyzed the eCLIP-seq data from  
665 ENCODE. We downloaded the BED files (HG38 version) of the called CLIP peaks for each  
666 eCLIP-seq data and used shifted z-score method to test how the strength of association  
667 between the RBP binding and the editing sites would change if the peak was shifted from its  
668 original position (Gel et al., 2016). The z-scores were calculated as the distance between the  
669 expected binding value and the observed one, measured in standard deviations. And we shifted  
670 the peaks 50bp stepwise within the 1.2kb up- and down-stream windows of the editing site to  
671 obtain the corresponding z-score values.

672

### 673 **Accession Numbers**

674 The high-throughput sequencing data utilized in this work, including the RNA-seq and mmPCR-  
675 seq libraries, have been deposited in the Gene Expression Omnibus (GEO) database,  
676 accession number GSE130771.

677

### 678 **ACKNOWLEDGEMENTS**

679 We thank Adam Freund, and all members of the Li Lab especially Tao Sun for useful  
680 discussions and comments on this paper. We would also like to thank Julia Salzman for her  
681 generous donation of the oligos used for rRNA depletion in the RNA-seq library preparation.

682 Funding sources: American Heart Association Postdoctoral grant 16POST27700036 (to E.C.F),  
683 National Center for Research Resources 5P41RR011823 (to JJM and JRY), NIH R01-  
684 GM102484 (to J.B.L.), R01-GM124215 (to J.B.L.), R01-MH115080 (to J.B.L.)  
685

## 686 REFERENCES

- 687 A Large-Scale Binding and Functional Map of Human RNA Binding Proteins | bioRxiv [WWW  
688 Document], n.d. URL <https://www.biorxiv.org/content/10.1101/179648v2> (accessed  
689 3.28.19).
- 690 Aktaş, T., Avşar Ilık, İ., Maticzka, D., Bhardwaj, V., Pessoa Rodrigues, C., Mittler, G., Manke, T.,  
691 Backofen, R., Akhtar, A., 2017. DHX9 suppresses RNA processing defects originating  
692 from the Alu invasion of the human genome. *Nature* 544, 115–119.  
693 <https://doi.org/10.1038/nature21715>
- 694 Anantharaman, A., Jadhaliha, M., Tripathi, V., Nakagawa, S., Hirose, T., Jantsch, M.F., Prasanth,  
695 S.G., Prasanth, K.V., 2016. Paraspeckles modulate the intranuclear distribution of  
696 paraspeckle-associated Ctn RNA. *Sci. Rep.* 6. <https://doi.org/10.1038/srep34043>
- 697 Athanasiadis, A., Rich, A., Maas, S., 2004. Widespread A-to-I RNA editing of Alu-containing  
698 mRNAs in the human transcriptome. *PLoS Biol.* 2, e391.  
699 <https://doi.org/10.1371/journal.pbio.0020391>
- 700 Bazak, L., Levanon, E.Y., Eisenberg, E., 2014. Genome-wide analysis of Alu editability. *Nucleic  
701 Acids Res.* 42, 6876–6884. <https://doi.org/10.1093/nar/gku414>
- 702 Behm, M., Wahlstedt, H., Widmark, A., Eriksson, M., Öhman, M., 2017. Accumulation of nuclear  
703 ADAR2 regulates adenosine-to-inosine RNA editing during neuronal development. *J.  
704 Cell Sci.* 130, 745–753. <https://doi.org/10.1242/jcs.200055>
- 705 Bhate, A., Sun, T., Li, J.B., 2019. ADAR1: A New Target for Immuno-oncology Therapy. *Mol.  
706 Cell* 73, 866–868. <https://doi.org/10.1016/j.molcel.2019.02.021>
- 707 Binothman, N., Hachim, I.Y., Lebrun, J.-J., Ali, S., 2017. CPSF6 is a Clinically Relevant Breast  
708 Cancer Vulnerability Target: Role of CPSF6 in Breast Cancer. *EBioMedicine* 21, 65–78.  
709 <https://doi.org/10.1016/j.ebiom.2017.06.023>
- 710 Blango, M.G., Bass, B.L., 2016. Identification of the long, edited dsRNAome of LPS-stimulated  
711 immune cells. *Genome Res.* 26, 852–862. <https://doi.org/10.1101/gr.203992.116>
- 712 Blow, M., Futreal, P.A., Wooster, R., Stratton, M.R., 2004. A survey of RNA editing in human  
713 brain. *Genome Res.* 14, 2379–2387. <https://doi.org/10.1101/gr.2951204>
- 714 Burns, C.M., Chu, H., Rueter, S.M., Hutchinson, L.K., Canton, H., Sanders-Bush, E., Emeson,  
715 R.B., 1997. Regulation of serotonin-2C receptor G-protein coupling by RNA editing.  
716 *Nature* 387, 303–308. <https://doi.org/10.1038/387303a0>
- 717 Castello, A., Fischer, B., Frese, C.K., Horos, R., Alleaume, A.-M., Foehr, S., Curk, T., Krijgsveld,  
718 J., Hentze, M.W., 2016. Comprehensive Identification of RNA-Binding Domains in  
719 Human Cells. *Mol. Cell* 63, 696–710. <https://doi.org/10.1016/j.molcel.2016.06.029>
- 720 Chu, L., Su, M.Y., Maggi, L.B., Lu, L., Mullins, C., Crosby, S., Huang, G., Chng, W.J., Vij, R.,  
721 Tomasson, M.H., 2012. Multiple myeloma-associated chromosomal translocation  
722 activates orphan snoRNA ACA11 to suppress oxidative stress. *J. Clin. Invest.* 122,  
723 2793–2806. <https://doi.org/10.1172/JCI63051>
- 724 Dobin, A., Davis, C.A., Schlesinger, F., Drenkow, J., Zaleski, C., Jha, S., Batut, P., Chaisson,  
725 M., Gingeras, T.R., 2013. STAR: ultrafast universal RNA-seq aligner. *Bioinforma. Oxf.  
726 Engl.* 29, 15–21. <https://doi.org/10.1093/bioinformatics/bts635>
- 727 Eisenberg, E., Levanon, E.Y., 2018. A-to-I RNA editing - immune protector and transcriptome  
728 diversifier. *Nat. Rev. Genet.* 19, 473–490. <https://doi.org/10.1038/s41576-018-0006-1>
- 729 Gannon, H.S., Zou, T., Kiessling, M.K., Gao, G.F., Cai, D., Choi, P.S., Ivan, A.P., Buchumenski,  
730 I., Berger, A.C., Goldstein, J.T., Cherniack, A.D., Vazquez, F., Tsherniak, A., Levanon,  
731 E.Y., Hahn, W.C., Meyerson, M., 2018. Identification of ADAR1 adenosine deaminase  
732 dependency in a subset of cancer cells. *Nat. Commun.* 9, 5450.  
733 <https://doi.org/10.1038/s41467-018-07824-4>

- 734 Garncarz, W., Tariq, A., Handl, C., Pusch, O., Jantsch, M.F., 2013. A high-throughput screen to  
735 identify enhancers of ADAR-mediated RNA-editing. *RNA Biol.* 10, 192–204.  
736 <https://doi.org/10.4161/rna.23208>
- 737 Gel, B., Díez-Villanueva, A., Serra, E., Buschbeck, M., Peinado, M.A., Malinverni, R., 2016.  
738 regioneR: an R/Bioconductor package for the association analysis of genomic regions  
739 based on permutation tests. *Bioinforma. Oxf. Engl.* 32, 289–291.  
740 <https://doi.org/10.1093/bioinformatics/btv562>
- 741 Hirose, T., Virnicchi, G., Tanigawa, A., Naganuma, T., Li, R., Kimura, H., Yokoi, T., Nakagawa,  
742 S., Bénard, M., Fox, A.H., Pierron, G., 2014. NEAT1 long noncoding RNA regulates  
743 transcription via protein sequestration within subnuclear bodies. *Mol. Biol. Cell* 25, 169–  
744 183. <https://doi.org/10.1091/mbc.E13-09-0558>
- 745 Huang, H., Kapeli, K., Jin, W., Wong, Y.P., Arumugam, T.V., Koh, J.H., Srimasorn, S.,  
746 Mallilankaraman, K., Chua, J.J.E., Yeo, G.W., Soong, T.W., 2018. Tissue-selective  
747 restriction of RNA editing of CaV1.3 by splicing factor SRSF9. *Nucleic Acids Res.* 46,  
748 7323–7338. <https://doi.org/10.1093/nar/gky348>
- 749 Ishizuka, J.J., Manguso, R.T., Cheruiyot, C.K., Bi, K., Panda, A., Iracheta-Vellve, A., Miller,  
750 B.C., Du, P.P., Yates, K.B., Dubrot, J., Buchumenski, I., Comstock, D.E., Brown, F.D.,  
751 Ayer, A., Kohnle, I.C., Pope, H.W., Zimmer, M.D., Sen, D.R., Lane-Reticker, S.K.,  
752 Robitschek, E.J., Griffin, G.K., Collins, N.B., Long, A.H., Doench, J.G., Kozono, D.,  
753 Levanon, E.Y., Haining, W.N., 2019. Loss of ADAR1 in tumours overcomes resistance to  
754 immune checkpoint blockade. *Nature* 565, 43–48. <https://doi.org/10.1038/s41586-018-0768-9>
- 755
- 756 Kim, D.I., Birendra, K.C., Zhu, W., Motamedchaboki, K., Doye, V., Roux, K.J., 2014. Probing  
757 nuclear pore complex architecture with proximity-dependent biotinylation. *Proc. Natl.*  
758 *Acad. Sci. U. S. A.* 111, E2453-2461. <https://doi.org/10.1073/pnas.1406459111>
- 759 Kwon, K., Streaker, E.D., Ruparelia, S., Beckett, D., 2000. Multiple disordered loops function in  
760 corepressor-induced dimerization of the biotin repressor. *J. Mol. Biol.* 304, 821–833.  
761 <https://doi.org/10.1006/jmbi.2000.4249>
- 762 Levanon, E.Y., Eisenberg, E., Yelin, R., Nemzer, S., Hallegger, M., Shemesh, R., Fligelman,  
763 Z.Y., Shoshan, A., Pollock, S.R., Sztybel, D., Olshansky, M., Rechavi, G., Jantsch, M.F.,  
764 2004. Systematic identification of abundant A-to-I editing sites in the human  
765 transcriptome. *Nat. Biotechnol.* 22, 1001–1005. <https://doi.org/10.1038/nbt996>
- 766 Li, B., Dewey, C.N., 2011. RSEM: accurate transcript quantification from RNA-Seq data with or  
767 without a reference genome. *BMC Bioinformatics* 12, 323. <https://doi.org/10.1186/1471-2105-12-323>
- 768
- 769 Li, H., Handsaker, B., Wysoker, A., Fennell, T., Ruan, J., Homer, N., Marth, G., Abecasis, G.,  
770 Durbin, R., 1000 Genome Project Data Processing Subgroup, 2009. The Sequence  
771 Alignment/Map format and SAMtools. *Bioinforma. Oxf. Engl.* 25, 2078–2079.  
772 <https://doi.org/10.1093/bioinformatics/btp352>
- 773 Li, X., Liu, C.-X., Xue, W., Zhang, Y., Jiang, S., Yin, Q.-F., Wei, J., Yao, R.-W., Yang, L., Chen,  
774 L.-L., 2017. Coordinated circRNA Biogenesis and Function with NF90/NF110 in Viral  
775 Infection. *Mol. Cell* 67, 214-227.e7. <https://doi.org/10.1016/j.molcel.2017.05.023>
- 776 Liddicoat, B.J., Piskol, R., Chalk, A.M., Ramaswami, G., Higuchi, M., Hartner, J.C., Li, J.B.,  
777 Seeburg, P.H., Walkley, C.R., 2015. RNA editing by ADAR1 prevents MDA5 sensing of  
778 endogenous dsRNA as nonself. *Science* 349, 1115–1120.  
779 <https://doi.org/10.1126/science.aac7049>
- 780 Liu, H., Golji, J., Brodeur, L.K., Chung, F.S., Chen, J.T., deBeaumont, R.S., Bullock, C.P.,  
781 Jones, M.D., Kerr, G., Li, L., Rakiec, D.P., Schlabach, M.R., Sovath, S., Growney, J.D.,  
782 Pagliarini, R.A., Ruddy, D.A., Maclsaac, K.D., Korn, J.M., McDonald, E.R., 2019. Tumor-  
783 derived IFN triggers chronic pathway agonism and sensitivity to ADAR loss. *Nat. Med.*  
784 25, 95. <https://doi.org/10.1038/s41591-018-0302-5>



- 785 Mannion, N.M., Greenwood, S.M., Young, R., Cox, S., Brindle, J., Read, D., Nellåker, C.,  
786 Vesely, C., Ponting, C.P., McLaughlin, P.J., Jantsch, M.F., Dorin, J., Adams, I.R.,  
787 Scadden, A.D.J., Ohman, M., Keegan, L.P., O'Connell, M.A., 2014. The RNA-editing  
788 enzyme ADAR1 controls innate immune responses to RNA. *Cell Rep.* 9, 1482–1494.  
789 <https://doi.org/10.1016/j.celrep.2014.10.041>
- 790 Marcucci, R., Brindle, J., Paro, S., Casadio, A., Hempel, S., Morrice, N., Bisso, A., Keegan, L.P.,  
791 Del Sal, G., O'Connell, M.A., 2011. Pin1 and WWP2 regulate GluR2 Q/R site RNA  
792 editing by ADAR2 with opposing effects. *EMBO J.* 30, 4211–4222.  
793 <https://doi.org/10.1038/emboj.2011.303>
- 794 Nemlich, Y., Baruch, E.N., Besser, M.J., Shoshan, E., Bar-Eli, M., Anafi, L., Barshack, I.,  
795 Schachter, J., Ortenberg, R., Markel, G., 2018. ADAR1-mediated regulation of  
796 melanoma invasion. *Nat. Commun.* 9, 2154. [https://doi.org/10.1038/s41467-018-04600-](https://doi.org/10.1038/s41467-018-04600-2)  
797 [2](https://doi.org/10.1038/s41467-018-04600-2)
- 798 Nie, Y., Ding, L., Kao, P.N., Braun, R., Yang, J.-H., 2005. ADAR1 interacts with NF90 through  
799 double-stranded RNA and regulates NF90-mediated gene expression independently of  
800 RNA editing. *Mol. Cell. Biol.* 25, 6956–6963. [https://doi.org/10.1128/MCB.25.16.6956-](https://doi.org/10.1128/MCB.25.16.6956-6963.2005)  
801 [6963.2005](https://doi.org/10.1128/MCB.25.16.6956-6963.2005)
- 802 Nishikura, K., 2016. A-to-I editing of coding and non-coding RNAs by ADARs. *Nat. Rev. Mol.*  
803 *Cell Biol.* 17, 83–96. <https://doi.org/10.1038/nrm.2015.4>
- 804 Nishikura, K., 2010. Functions and regulation of RNA editing by ADAR deaminases. *Annu. Rev.*  
805 *Biochem.* 79, 321–349. <https://doi.org/10.1146/annurev-biochem-060208-105251>
- 806 Orecchini, E., Frassinelli, L., Michienzi, A., 2017. Restricting retrotransposons: ADAR1 is  
807 another guardian of the human genome. *RNA Biol.* 14, 1485–1491.  
808 <https://doi.org/10.1080/15476286.2017.1341033>
- 809 Pestal, K., Funk, C.C., Snyder, J.M., Price, N.D., Treuting, P.M., Stetson, D.B., 2015. Isoforms  
810 of RNA-Editing Enzyme ADAR1 Independently Control Nucleic Acid Sensor MDA5-  
811 Driven Autoimmunity and Multi-organ Development. *Immunity* 43, 933–944.  
812 <https://doi.org/10.1016/j.immuni.2015.11.001>
- 813 Quinones-Valdez, G., Tran, S.S., Jun, H.-I., Bahn, J.H., Yang, E.-W., Zhan, L., Brümmer, A.,  
814 Wei, X., Van Nostrand, E.L., Pratt, G.A., Yeo, G.W., Graveley, B.R., Xiao, X., 2019.  
815 Regulation of RNA editing by RNA-binding proteins in human cells. *Commun. Biol.* 2.  
816 <https://doi.org/10.1038/s42003-018-0271-8>
- 817 Rice, G.I., Kasher, P.R., Forte, G.M.A., Mannion, N.M., Greenwood, S.M., Szykiewicz, M.,  
818 Dickerson, J.E., Bhaskar, S.S., Zampini, M., Briggs, T.A., Jenkinson, E.M., Bacino, C.A.,  
819 Battini, R., Bertini, E., Brogan, P.A., Brueton, L.A., Carpanelli, M., De Laet, C., de  
820 Lonlay, P., del Toro, M., Desguerre, I., Fazzi, E., Garcia-Cazorla, A., Heiberg, A.,  
821 Kawaguchi, M., Kumar, R., Lin, J.-P.S.-M., Lourenco, C.M., Male, A.M., Marques, W.,  
822 Mignot, C., Olivieri, I., Orcesi, S., Prabhakar, P., Rasmussen, M., Robinson, R.A.,  
823 Rozenberg, F., Schmidt, J.L., Steindl, K., Tan, T.Y., van der Merwe, W.G., Vanderver,  
824 A., Vassallo, G., Wakeling, E.L., Wassmer, E., Whittaker, E., Livingston, J.H., Lebon, P.,  
825 Suzuki, T., McLaughlin, P.J., Keegan, L.P., O'Connell, M.A., Lovell, S.C., Crow, Y.J.,  
826 2012. Mutations in ADAR1 cause Aicardi-Goutières syndrome associated with a type I  
827 interferon signature. *Nat. Genet.* 44, 1243–1248. <https://doi.org/10.1038/ng.2414>
- 828 Roux, K.J., Kim, D.I., Raida, M., Burke, B., 2012. A promiscuous biotin ligase fusion protein  
829 identifies proximal and interacting proteins in mammalian cells. *J. Cell Biol.* 196, 801–  
830 810. <https://doi.org/10.1083/jcb.201112098>
- 831 Rueter, S.M., Dawson, T.R., Emeson, R.B., 1999. Regulation of alternative splicing by RNA  
832 editing. *Nature* 399, 75–80. <https://doi.org/10.1038/19992>
- 833 Sapiro, A.L., Freund, E.C., Restrepo, L., Qiao, H.-H., Bhate, A., Ni, J.-Q., Mosca, T.J., Li, J.B.,  
834 n.d. Zinc finger RNA binding protein Zn72D regulates ADAR-mediated RNA editing in  
835 neurons. *BioRxiv*.

- 836 Sapiro, A.L., Shmueli, A., Henry, G.L., Li, Q., Shalit, T., Yaron, O., Paas, Y., Li, J.B., Shohat-  
837 Ophir, G., 2019. Illuminating spatial A-to-I RNA editing signatures within the *Drosophila*  
838 brain. *Proc. Natl. Acad. Sci.* 116, 2318–2327. <https://doi.org/10.1073/pnas.1811768116>
- 839 Shanmugam, R., Zhang, F., Srinivasan, H., Charles Richard, J.L., Liu, K.I., Zhang, X., Woo,  
840 C.W.A., Chua, Z.H.M., Buschdorf, J.P., Meaney, M.J., Tan, M.H., 2018. SRSF9  
841 selectively represses ADAR2-mediated editing of brain-specific sites in primates. *Nucleic  
842 Acids Res.* 46, 7379–7395. <https://doi.org/10.1093/nar/gky615>
- 843 Slotkin, W., Nishikura, K., 2013. Adenosine-to-inosine RNA editing and human disease.  
844 *Genome Med.* 5, 105. <https://doi.org/10.1186/gm508>
- 845 Stellos, K., Gatsiou, A., Stamatelopoulos, K., Perisic Matic, L., John, D., Lunella, F.F., Jaé, N.,  
846 Rossbach, O., Amrhein, C., Sigala, F., Boon, R.A., Fürtig, B., Manavski, Y., You, X.,  
847 Uchida, S., Keller, T., Boeckel, J.-N., Franco-Cereceda, A., Maegdefessel, L., Chen, W.,  
848 Schwalbe, H., Bindereif, A., Eriksson, P., Hedin, U., Zeiher, A.M., Dimmeler, S., 2016.  
849 Adenosine-to-inosine RNA editing controls cathepsin S expression in atherosclerosis by  
850 enabling HuR-mediated post-transcriptional regulation. *Nat. Med.* 22, 1140–1150.  
851 <https://doi.org/10.1038/nm.4172>
- 852 Sundararaman, B., Zhan, L., Blue, S.M., Stanton, R., Elkins, K., Olson, S., Wei, X., Van  
853 Nostrand, E.L., Pratt, G.A., Huelga, S.C., Smalec, B.M., Wang, X., Hong, E.L.,  
854 Davidson, J.M., Lécuyer, E., Graveley, B.R., Yeo, G.W., 2016. Resources for the  
855 Comprehensive Discovery of Functional RNA Elements. *Mol. Cell* 61, 903–913.  
856 <https://doi.org/10.1016/j.molcel.2016.02.012>
- 857 Tan, M.H., Li, Q., Shanmugam, R., Piskol, R., Kohler, J., Young, A.N., Liu, K.I., Zhang, R.,  
858 Ramaswami, G., Ariyoshi, K., Gupte, A., Keegan, L.P., George, C.X., Ramu, A., Huang,  
859 N., Pollina, E.A., Leeman, D.S., Rustighi, A., Goh, Y.P.S., GTEX Consortium,  
860 Laboratory, Data Analysis & Coordinating Center (LDACC)—Analysis Working Group,  
861 Statistical Methods groups—Analysis Working Group, Enhancing GTEX (eGTEX) groups,  
862 NIH Common Fund, NIH/NCI, NIH/NHGRI, NIH/NIMH, NIH/NIDA, Biospecimen  
863 Collection Source Site—NDRI, Biospecimen Collection Source Site—RPCI,  
864 Biospecimen Core Resource—VARI, Brain Bank Repository—University of Miami Brain  
865 Endowment Bank, Leidos Biomedical—Project Management, ELSI Study, Genome  
866 Browser Data Integration & Visualization—EBI, Genome Browser Data Integration  
867 & Visualization—UCSC Genomics Institute, University of California Santa Cruz, Chawla,  
868 A., Del Sal, G., Peltz, G., Brunet, A., Conrad, D.F., Samuel, C.E., O’Connell, M.A.,  
869 Walkley, C.R., Nishikura, K., Li, J.B., 2017. Dynamic landscape and regulation of RNA  
870 editing in mammals. *Nature* 550, 249–254. <https://doi.org/10.1038/nature24041>
- 871 Tariq, A., Garncarz, W., Handl, C., Balik, A., Pusch, O., Jantsch, M.F., 2013. RNA-interacting  
872 proteins act as site-specific repressors of ADAR2-mediated RNA editing and fluctuate  
873 upon neuronal stimulation. *Nucleic Acids Res.* 41, 2581–2593.  
874 <https://doi.org/10.1093/nar/gks1353>
- 875 Tran, S.S., Jun, H.-I., Bahn, J.H., Azghadi, A., Ramaswami, G., Nostrand, E.L.V., Nguyen, T.B.,  
876 Hsiao, Y.-H.E., Lee, C., Pratt, G.A., Martínez-Cerdeño, V., Hagerman, R.J., Yeo, G.W.,  
877 Geschwind, D.H., Xiao, X., 2019. Widespread RNA editing dysregulation in brains from  
878 autistic individuals. *Nat. Neurosci.* 22, 25. <https://doi.org/10.1038/s41593-018-0287-x>
- 879 Wahlstedt, H., Daniel, C., Ensterö, M., Ohman, M., 2009. Large-scale mRNA sequencing  
880 determines global regulation of RNA editing during brain development. *Genome Res.* 19,  
881 978–986. <https://doi.org/10.1101/gr.089409.108>
- 882 Walkley, C.R., Li, J.B., 2017. Rewriting the transcriptome: adenosine-to-inosine RNA editing by  
883 ADARs. *Genome Biol.* 18, 205. <https://doi.org/10.1186/s13059-017-1347-3>
- 884 Wolkowicz, U.M., Cook, A.G., 2012. NF45 dimerizes with NF90, Zfr and SPNR via a conserved  
885 domain that has a nucleotidyltransferase fold. *Nucleic Acids Res.* 40, 9356–9368.  
886 <https://doi.org/10.1093/nar/gks696>

887 Yang, B., Hu, P., Lin, X., Han, W., Zhu, L., Tan, X., Ye, F., Wang, G., Wu, F., Yin, B., Bao, Z.,  
888 Jiang, T., Yuan, J., Qiang, B., Peng, X., 2015. PTBP1 induces ADAR1 p110 isoform  
889 expression through IRES-like dependent translation control and influences cell  
890 proliferation in gliomas. *Cell. Mol. Life Sci. CMLS* 72, 4383–4397.  
891 <https://doi.org/10.1007/s00018-015-1938-7>  
892 Zhang, R., Li, X., Ramaswami, G., Smith, K.S., Turecki, G., Montgomery, S.B., Li, J.B., 2014.  
893 Quantifying RNA allelic ratios by microfluidics-based multiplex PCR and deep  
894 sequencing. *Nat. Methods* 11, 51–54. <https://doi.org/10.1038/nmeth.2736>  
895  
896

897

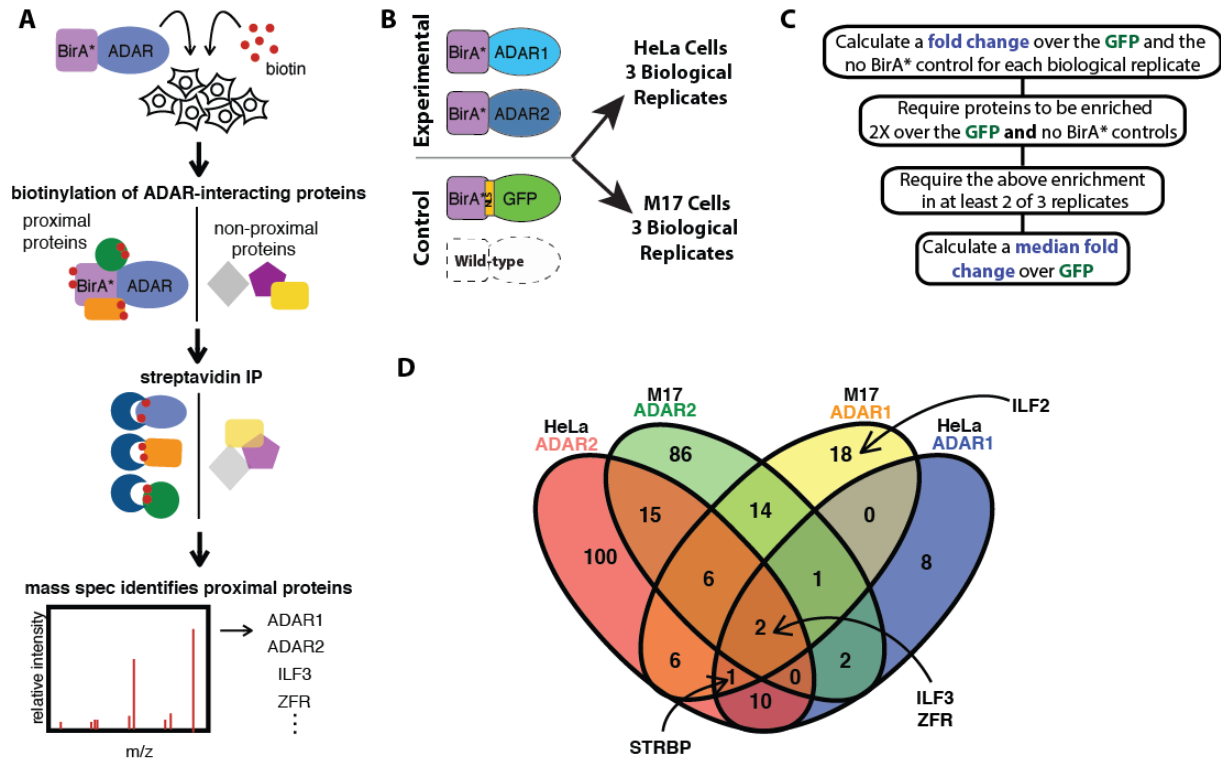

898  
899  
900  
901  
902  
903  
904  
905  
906  
907  
908  
909  
910  
911  
912  
913  
914  
915  
916

**Figure 1. BioID in human cells identifies known and novel regulators of ADAR1 and ADAR2**

**A.** Schematic depicting BioID protocol for ADAR. A fusion of ADAR1 or ADAR2 with the BirA\* enzyme was expressed in cells and the media was supplemented with exogenous Biotin, allowing for the fusion protein to biotinylate proximal proteins. A Streptavidin IP was then performed to isolate biotinylated proteins. The eluted proteins were then identified by mass spectrometry. **B.** Schematic of BioID experimental conditions. The experiment was performed with two different BioID fusion proteins, BirA\*-ADAR1 and BirA\*-ADAR2, and two negative controls, BirA\*-GFP and untransfected cells with no BirA expressed. Each fusion protein and control was assayed in HeLa and M17 cells for a total of eight experimental conditions, performed in triplicate. **C.** Pipeline depicting the analysis performed to determine and rank BioID hits. A series of filters were applied using each control condition to remove false positives. Median fold change over the GFP condition was used to rank the hits. **D.** Venn diagram depicting the hits from each BioID experiment. The hits from each BioID are indicated by differently colored ovals (pink: HeLa ADAR2, green: M17 ADAR2, Yellow: M17 ADAR1, Blue: HeLa ADAR1). The numbers indicate the number of hits that overlap between each condition and the proteins denoted in bold are the BioID hits further characterized in this study.

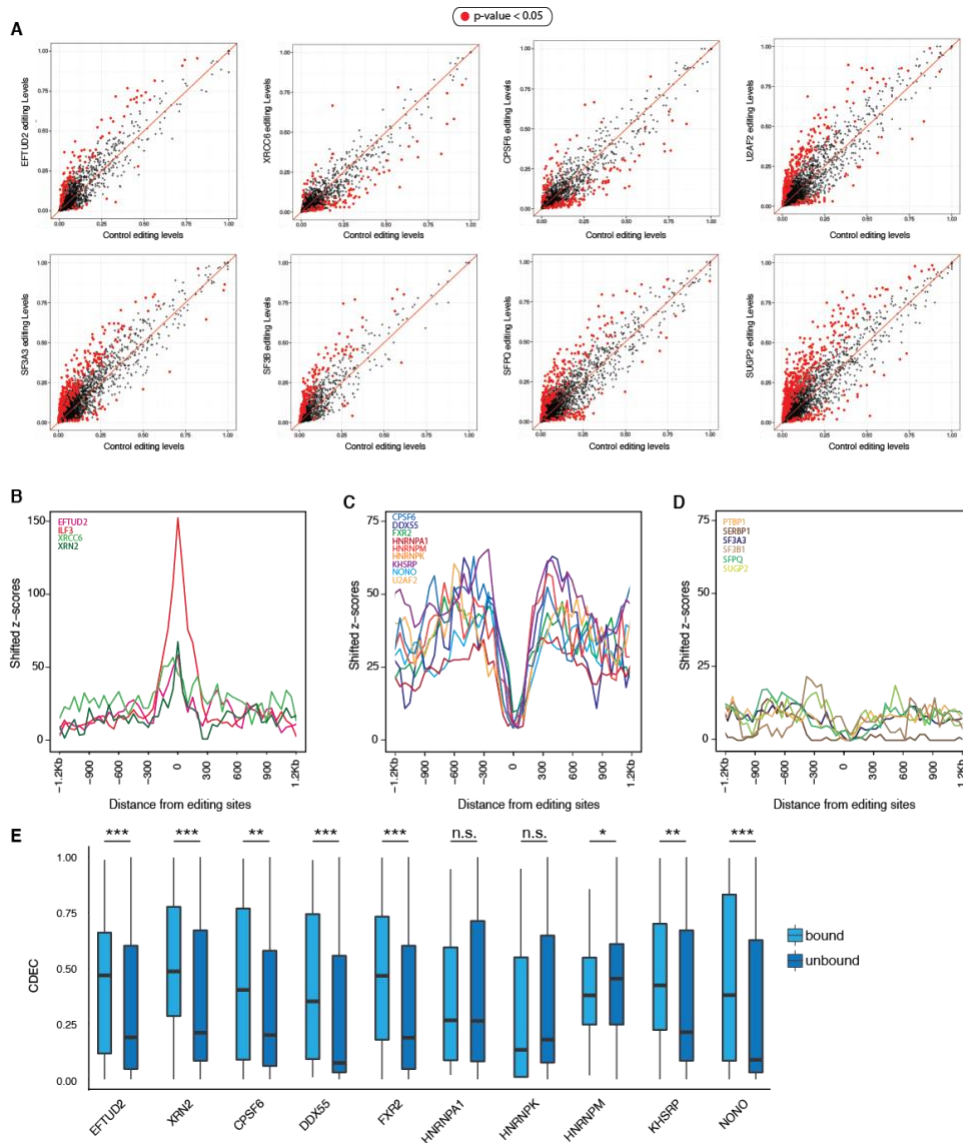

917  
918  
919  
920  
921  
922  
923  
924  
925  
926  
927  
928  
929

**Figure 2. RNA-seq and eCLIP-seq analyses identify regulatory RNA-binding proteins of RNA editing.**

**A.** Scatter plots of pairwise comparison of editing levels between knockdown and control RNA-seq of 8 top regulatory RBPs. Red dots, Fisher's exact test p-value < 0.05. **B-D.** Z-scores showing the observed RBP binding strength over the expected one, measured in standard deviations (see **Methods** section for details). **B.** RBPs that bind directly to editing sites in eCLIP-seq. **C.** RBPs that bind near-by editing sites (non-overlapping) in eCLIP-seq. **D.** RBPs that show no enrichment of binding near editing sites in eCLIP-seq. **E.** Comparison of editing profile differences in knockdowns between sites bound by RBPs (light blue) and the ones unbound (dark blue). CDED: cumulative distribution of editing level deviation, quantifies the accumulative editing level difference from the mean between controls and knockdowns (**Methods**).

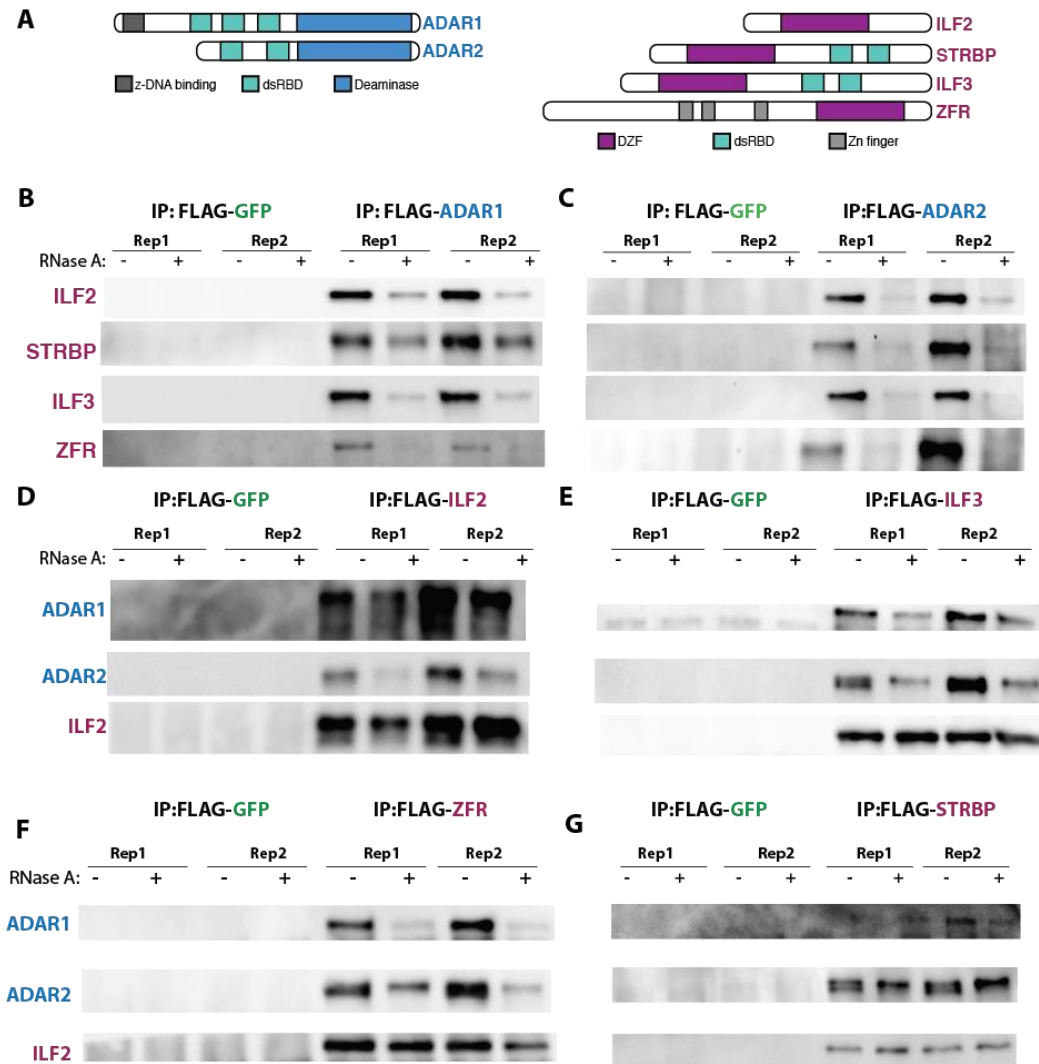

930

931

932

933

934

935

936

937

938

939

940

941

942

943

**Figure 3. co-IPs demonstrate that DZF-domain-containing BioID hits interact with ADAR1 and ADAR2 in an RNA-dependent manner**

**A.** Schematic depicting ADAR1, ADAR2 and DZF-domain-containing proteins ILF2, STRBP, ILF3, and ZFR. Conserved domains are indicated with different colors. **B-C.** Western blots of FLAG immunoprecipitation of M17 cells overexpressing either FLAG-GFP (negative control), FLAG-ADAR1, or FLAG-ADAR2. IPs were performed with or without the addition of RNase A to the lysates prior to IP, as indicated. **D-G.** Western blots of FLAG immunoprecipitation of M17 cells overexpressing ADAR2 as well as FLAG-GFP (negative control) or a FLAG tagged version of each DZF-domain-containing protein, (D) ILF2, (E) ILF3, (F) ZFR, (G) STRBP. IPs were performed with or without the addition of RNase A to the lysates prior to IP, as indicated. ILF2, which interacts with itself, ILF3, ZFR, and STRBP in an RNA-independent manner, was used as a positive control.

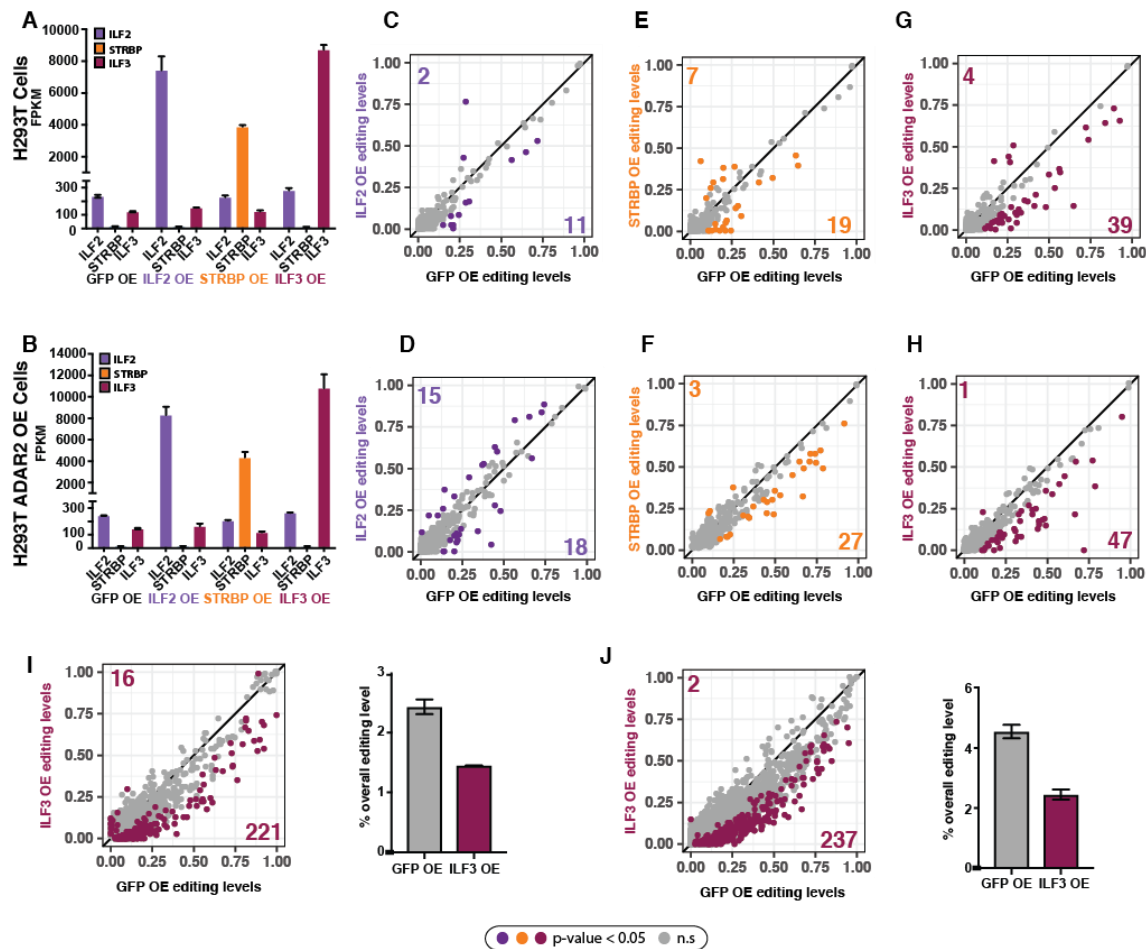

944  
945  
946  
947  
948  
949  
950  
951  
952  
953  
954  
955  
956  
957  
958  
959  
960  
961  
962

**Figure 4. Overexpression of DZF-domain-containing proteins alters RNA editing levels.**

**A-B.** FPKMs of ILF2, STRBP, and ILF3 in (A) HEK293T and (B) HEK293T-ADAR2-overexpression cells transiently transfected with GFP, ILF2, STRBP, or ILF3. Error bars represent standard deviation. **C-H.** Scatterplots comparing RNA editing levels assayed by mmPCR-seq in HEK293T cells (upper) and HEK293T cells stably overexpressing ADAR2 (lower). Plots compare editing levels in cells overexpressing GFP with editing levels in cells overexpressing a DZF-domain-containing protein ILF2 (C,D), STRBP (E,F) ILF3 (G,H). Colored dots indicate sites that are significantly changed ( $p < 0.05$ , Fisher's exact tests). The number of sites with significantly increased (top left) or significantly decreased (bottom right) editing levels are indicated on each graph. **I-J.** Scatterplots comparing RNA editing levels assayed by RNA-seq in HEK293T cells (I) and HEK293T cells stably overexpressing ADAR2 (J). Plot compares editing levels in cells overexpressing GFP with editing levels in cells overexpressing ILF3. Colored dots indicate sites that are significantly changed ( $p < 0.05$ , Fisher's exact tests). The number of sites with significantly increased (top left) or significantly decreased (bottom right) editing levels are indicated on each graph. Bar graphs to the right of each scatterplot depict overall editing levels (percentage of edited reads at all sites) for GFP overexpression (grey) and ILF3 overexpression (red).

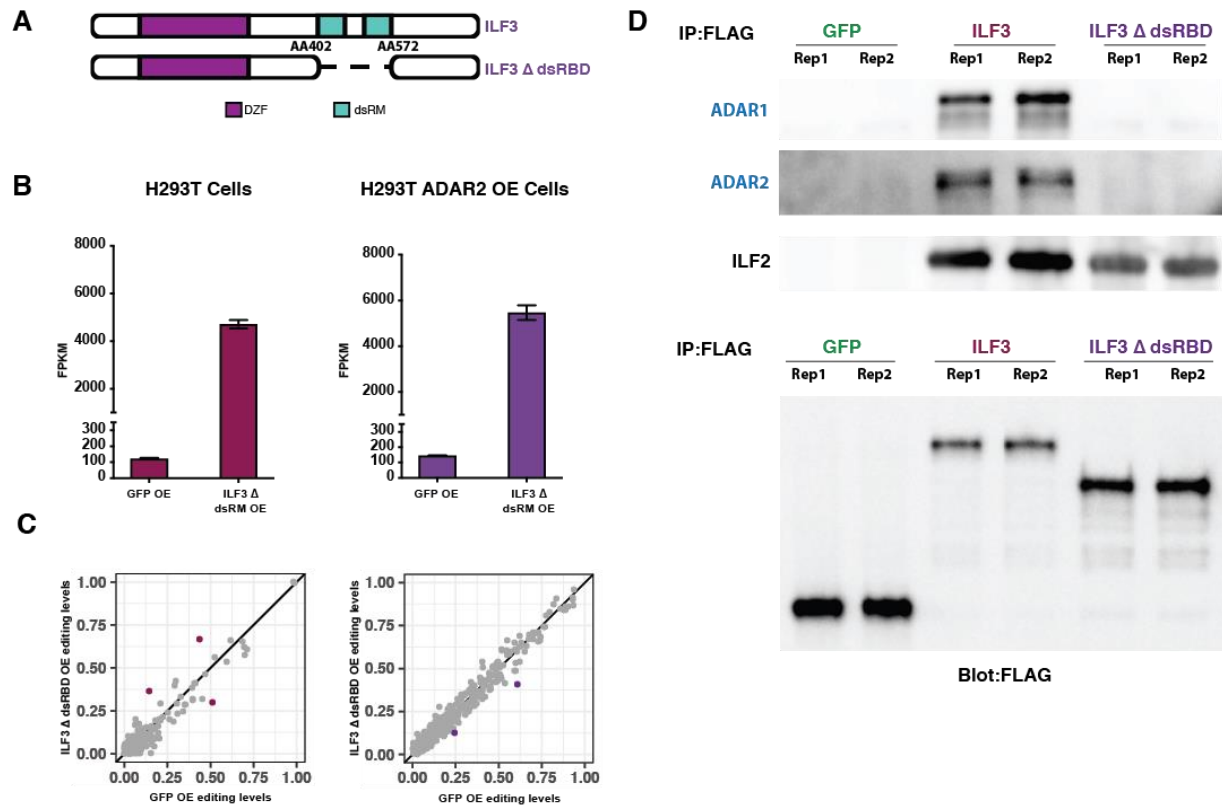

963  
 964 **Figure 5. Overexpression of ILF3 dsRNA-binding mutant does not interact with either ADAR or**  
 965 **affect editing levels.** **A.** Schematic of ILF3 double-stranded RNA binding domain (dsRBD mutant,  
 966 dashed lines indicate the deleted region (which spans amino acids 402-572). **B.** Bar graphs depicting the  
 967 FPKM of ILF3 in GFP and ILF3 $\Delta$ dsRBD overexpression in HEK293T cells (left) and HEK293T cells stably  
 968 overexpressing ADAR2 (right). **C.** Scatterplots comparing RNA editing levels assayed by mmPCR-seq in  
 969 HEK293T cells (left) and HEK293T cells stably overexpressing ADAR2 (right). Plot compares editing  
 970 levels in cells overexpressing GFP (negative control, x-axis) with editing levels in cells overexpressing  
 971 ILF3 $\Delta$ dsRBD (y-axis). Colored dots indicate sites that are significantly changed ( $p < 0.05$ , Fisher's exact  
 972 tests). Overexpression of the ILF3 dsRBD mutant does not affect editing levels. **D.** Western blots of FLAG  
 973 immunoprecipitation of HEK293T cells overexpressing ADAR2 and either FLAG-GFP (negative control),  
 974 FLAG-ILF3, or FLAG- ILF3 $\Delta$ dsRBD. ILF3 $\Delta$ dsRBD mutant does not interact with ADAR1 or ADAR2, but  
 975 maintains its interaction with ILF2.  
 976  
 977



978  
979  
980

### Supplemental Figures

PAICS - chr4: 57,326,879

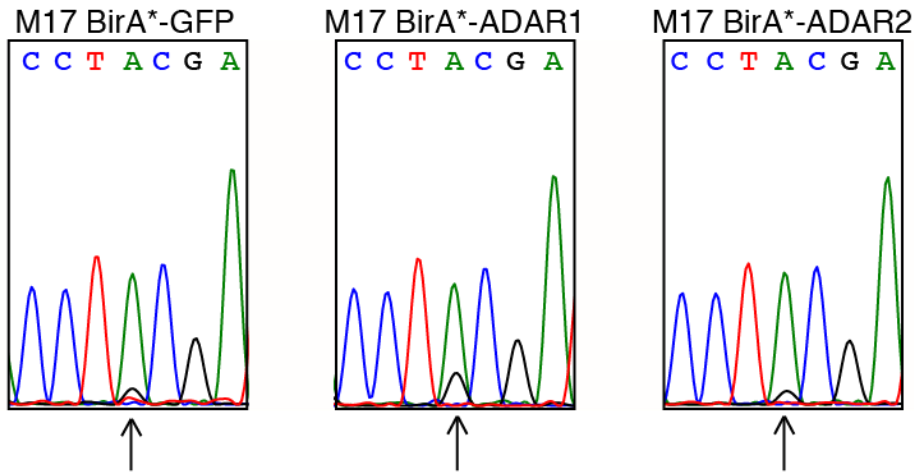

GRIA2 - chr4: 158,257,875

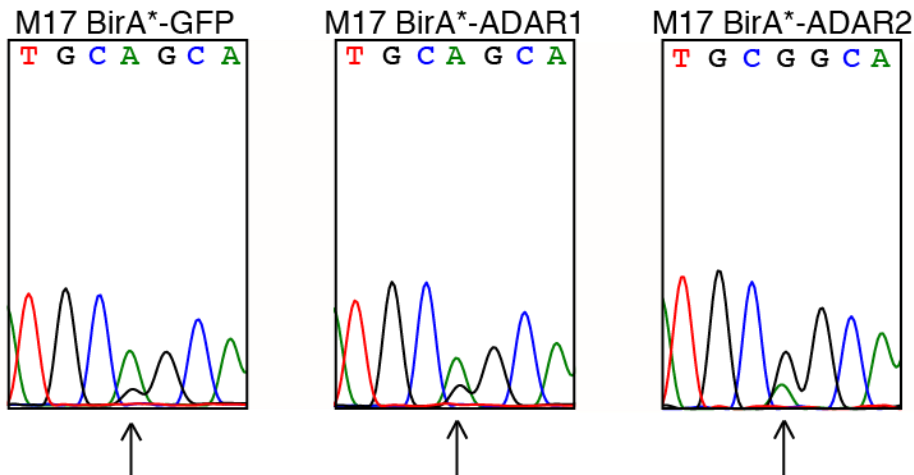

981  
982  
983  
984  
985  
986  
987  
988  
989  
990  
991

**Figure S1. BirA\*-ADAR1 and BirA\*-ADAR2 retain editing activity.** (A) Sanger sequencing traces at an ADAR1-regulated editing site in *PAICS* (chr4: 57,326,879) in M17 cells expressing BirA\*-GFP, BirA\*-ADAR1, and BirA\*-ADAR2 assayed in BioID experiments. The site is most highly edited in cells expressing BirA\*-ADAR1. (B) Sanger sequencing traces at an ADAR2-regulated editing site in *GRIA2* (chr4: 158,257,875) in M17 cells expressing BirA\*-GFP, BirA\*-ADAR1, and BirA\*-ADAR2 assayed in BioID experiments. The site is most highly edited in cells expressing BirA\*-ADAR2. Arrows denote each editing site in the sequence.

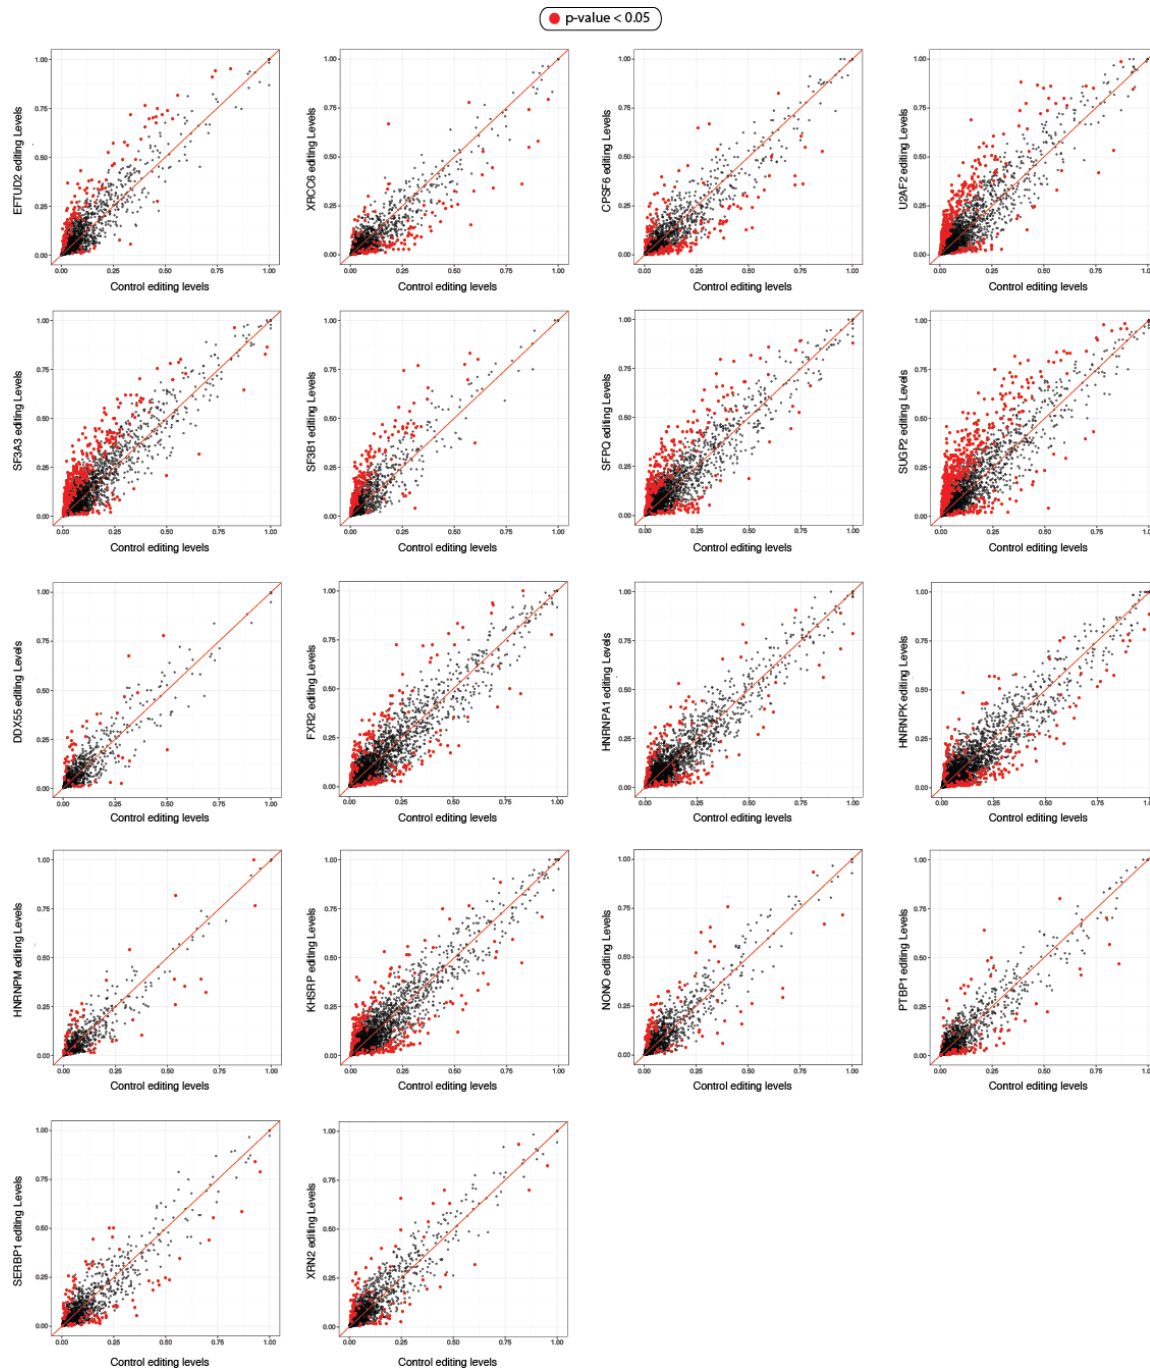

992  
993  
994  
995

**Figure S2.** Scatter plots of pairwise comparison of editing levels between knockdown and control RNA-seq of RBPs that were also found in the BioID assay. Red dots, Fisher's exact test p-value < 0.05.

996

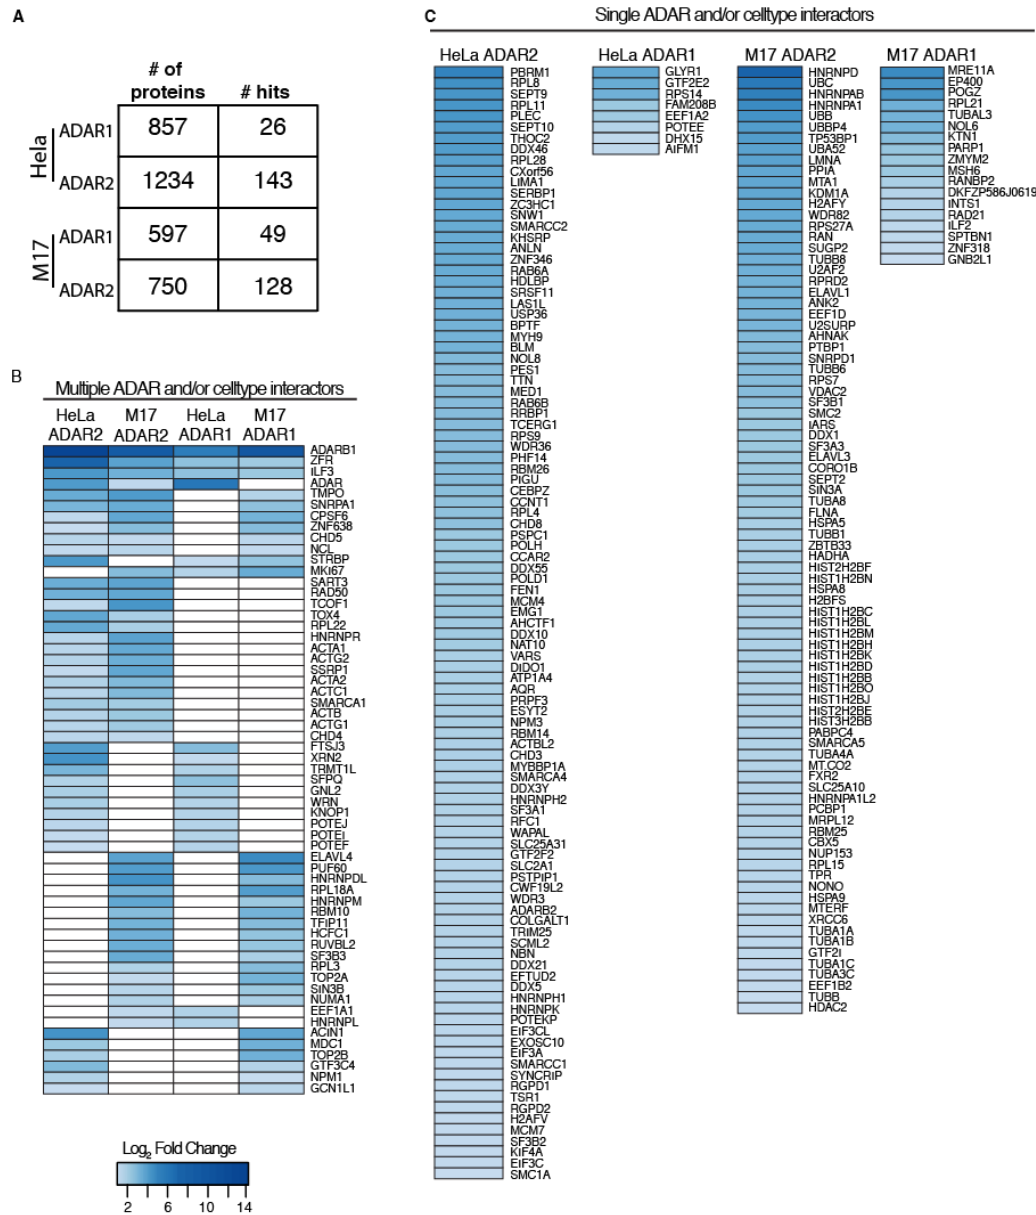

997  
998  
999  
1000  
1001  
1002  
1003  
1004  
1005  
1006

**Figure S3. BioID of ADAR1 and ADAR2 in HeLa and M17 cells reveals interactors specific to each cell type and each ADAR** (A) The total number of proteins identified by mass spec from each IP and the number of hits remaining after the filtering pipeline illustrated in Figure 1C. (B) A heatmap displaying the hits identified in multiple IPs. All proteins detected in at least two conditions are displayed, arranged by unsupervised hierarchical clustering. The strength of blue indicates the log fold change over the GFP control. White indicates that the protein was not detected in the IP. (C) A heatmap displaying all proteins identified in only one condition. The strength of blue indicates the log fold change over the GFP control.

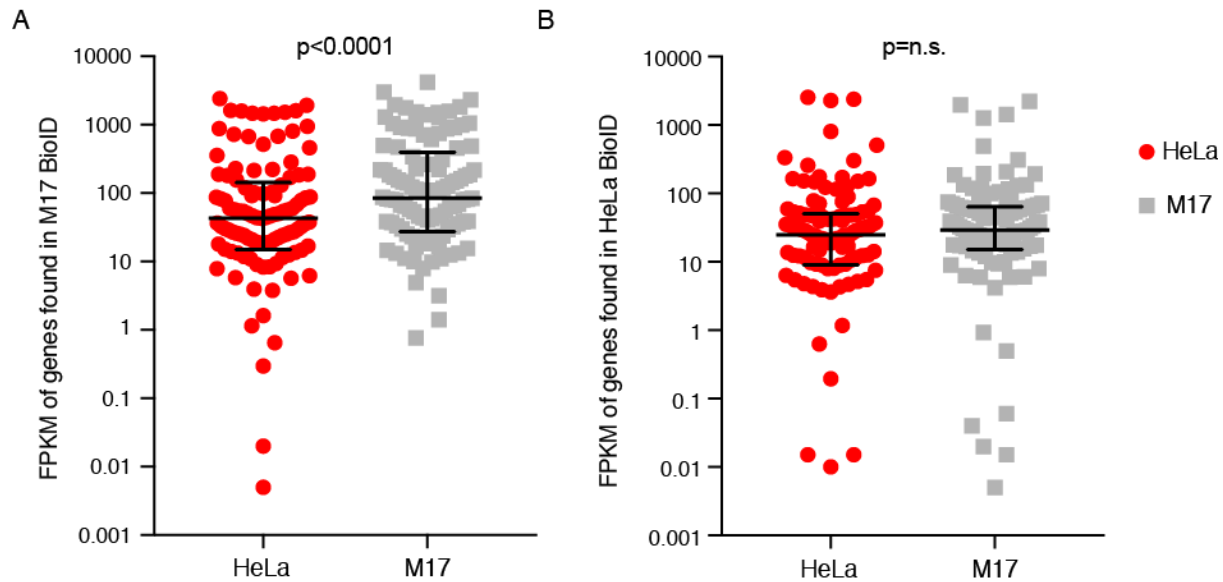

1007  
1008  
1009  
1010  
1011  
1012  
1013  
1014  
1015  
1016  
1017

**Figure S4. Genes found in the M17 BioID are more highly expressed in M17 cells. A.** Gene expression of all genes that encode proteins identified in the M17 ADAR1 and ADAR2 BioID screens. Each dot represents the FPKM in HeLa (red) or M17 (grey) cells, as assayed by RNA-seq. Overall, the set of genes is more highly expressed in M17 cells versus HeLa. **B.** Gene expression of all genes that encode proteins that were identified in the HeLa ADAR1 and ADAR2 BioID screens. Each dot represents the FPKM in HeLa (red) or M17 (grey) cells, as assayed by RNA-seq. There is not a significant difference between HeLa and M17. The median (middle black bar) with interquartile range (HeLa, black bars and M17, black bars) are shown for each plot. P-values were determined by Wilcoxon matched pairs signed rank test.

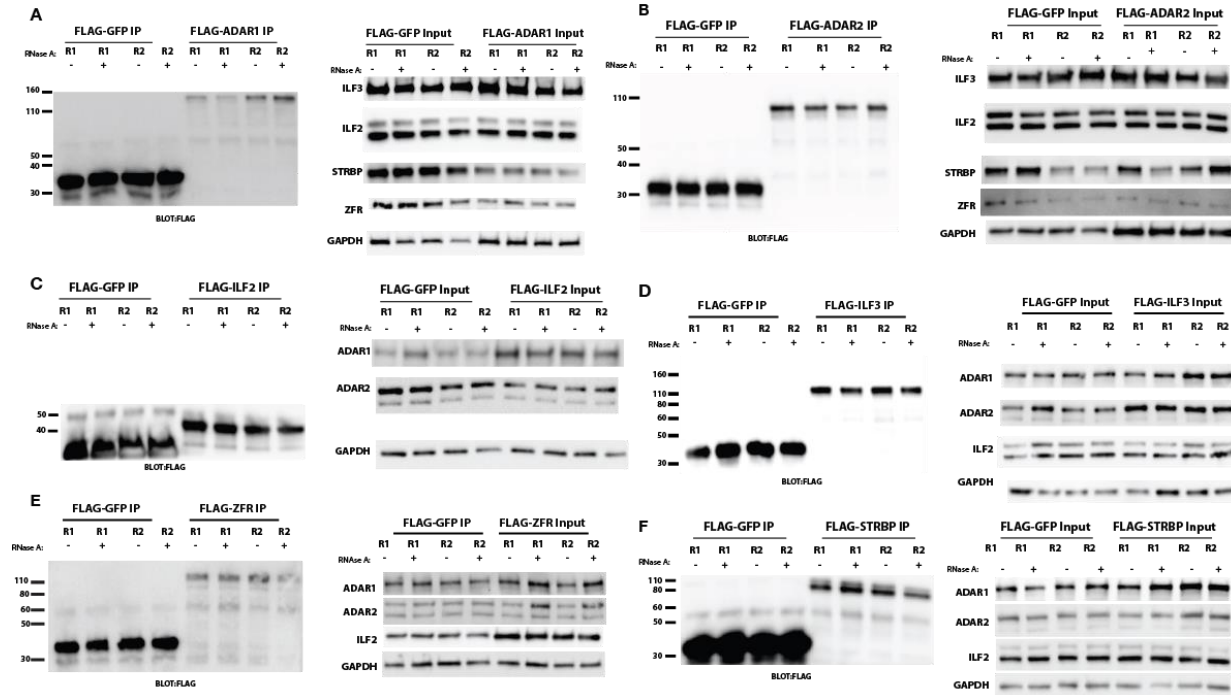

1018  
1019  
1020  
1021  
1022  
1023  
1024  
1025

**Figure S5. Input of the IPs from Figure 3 show strong expression of each FLAG-tagged construct and blotted protein. A.** Inputs of IPs from Figure 3B. **B.** Inputs of IPs from Figure 3C. **C.** Inputs of IPs from Figure 3D. **D.** Inputs of IPs from Figure 3E. **E.** Inputs of IPs from Figure 3F. **F.** Inputs of IPs from Figure 3G.

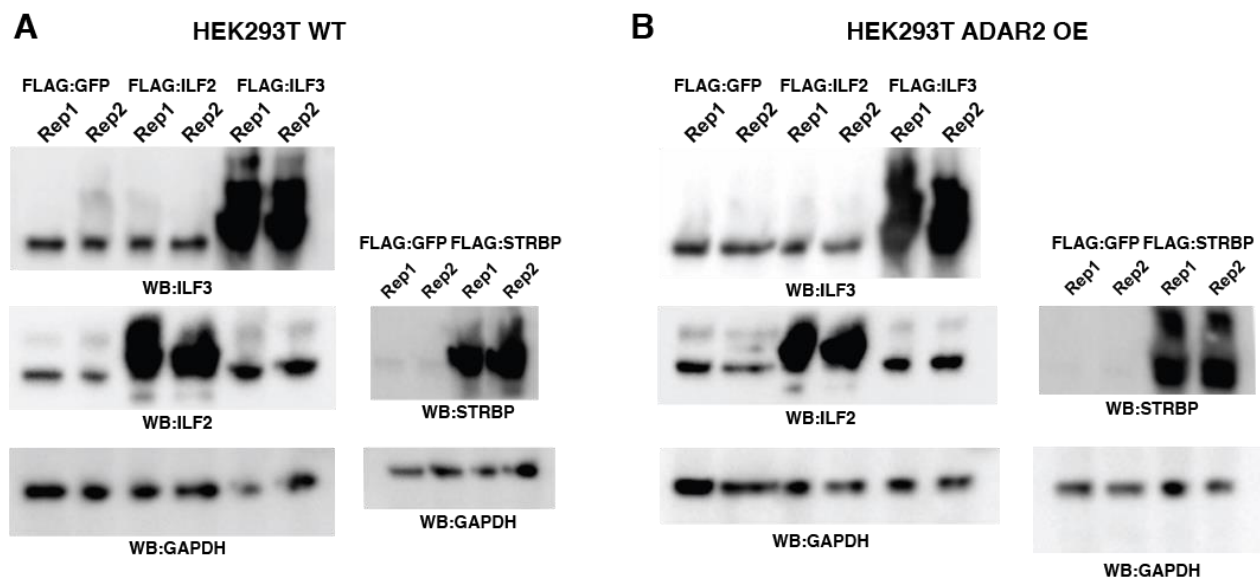

1026  
1027  
1028  
1029  
1030  
1031  
1032  
1033  
1034

**Figure S6. The overexpression of each DZF-domain-containing protein in the cells lines assayed by RNA-seq and mmPCR-seq in Figure 3 were determined by western blot. A.** Protein from HEK293T cells transiently overexpressing FLAG fused to ILF2, ILF3 (left) and STRBP (right) was blotted for ILF3, ILF2, STRBP and GAPDH as a control. **B.** Protein from HEK293T A2 OE cells transiently overexpressing FLAG fused to ILF2, ILF3 (left) and STRBP (right) was blotted for ILF3, ILF2, STRBP and GAPDH as a control.

## A mmPCR-seq Analysis

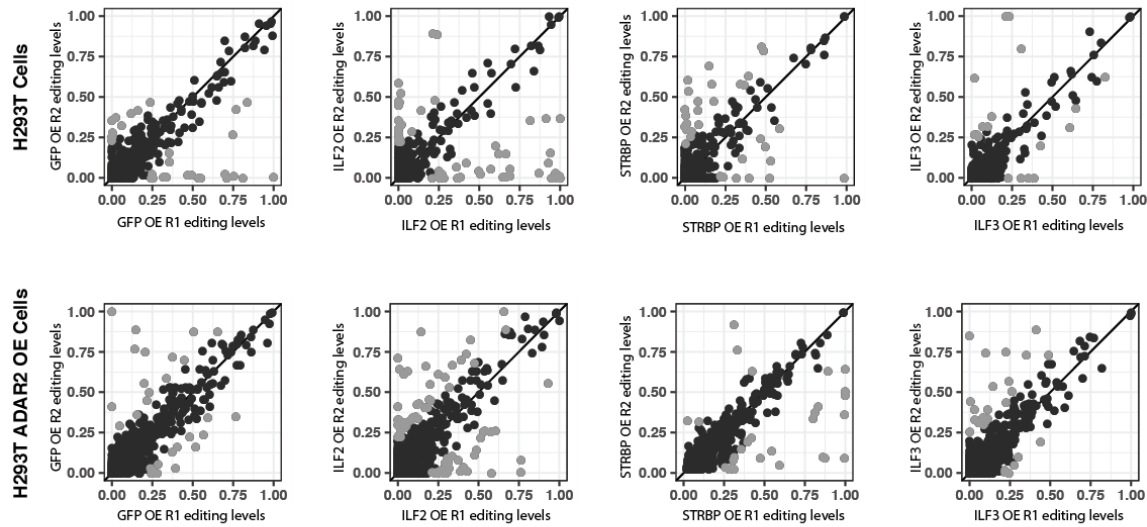

## B RNA-seq Analysis

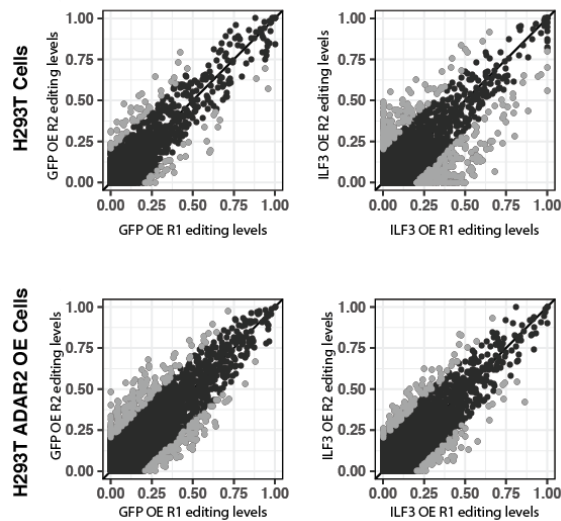

1035  
1036  
1037  
1038  
1039  
1040  
1041  
1042  
1043  
1044  
1045

**Figure S7. mmPCR-seq to measure editing levels demonstrates low variability in biological replicates. Sites with high variability were removed from further analysis. A.** Scatterplots of biological replicates assayed by mmPCR-seq from HEK293T (top row) and HEK293T ADAR2 OE (bottom row) overexpressing GFP, ILF2, STRBP or ILF3 (from Figure 3). Gray dots represent sites with more than 20% variability between replicates, and were not included in further analysis. **B.** Scatterplots of biological replicates assayed by RNA-seq from HEK293T (top row) and HEK293T ADAR2 OE (bottom row) overexpressing GFP (left) or ILF3 (right). Gray dots represent sites with more than 20% variability between replicates, and were not included in further analysis.

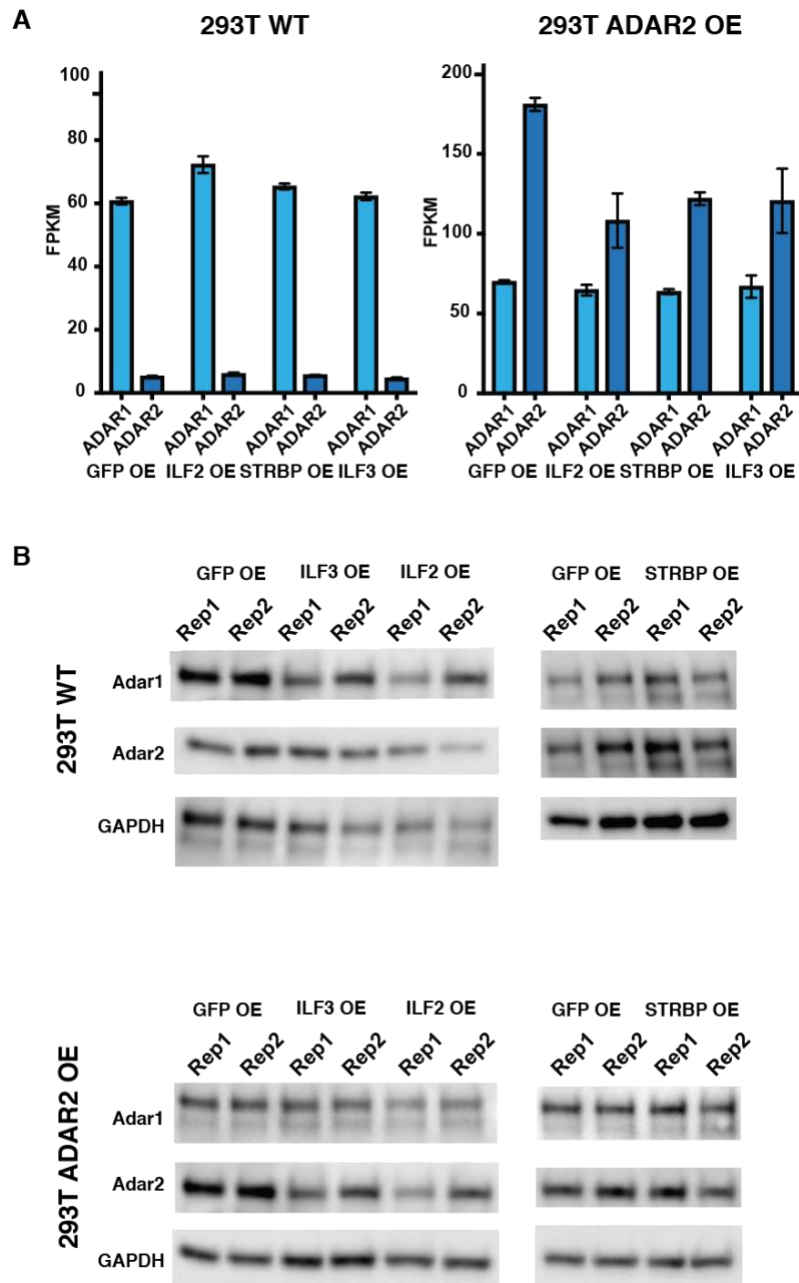

1046  
1047

1048 **Figure S8. Levels of ADAR1 and ADAR2 are not greatly changed in cells lines overexpressing**  
 1049 **DZF-domain-containing proteins.** **A.** Levels of ADAR1 (light blue) and ADAR2 (dark blue) in HEK293T  
 1050 WT (left) and HEK293T A2 OE (right) cells overexpressing GFP, ILF2, STRBP or ILF3. n = 2 biological  
 1051 replicates. The transcript levels of ADAR1 are not significantly changed in HEK293T or HEK293T A2 OE  
 1052 cells. The transcript levels of ADAR2 are reduced in HEK293T A2 OE cells overexpressing DZF-domain-  
 1053 containing proteins compared to GFP. **B.** Protein from HEK293T (top) or HEK293T A2 OE (bottom) cells  
 1054 overexpressing GFP, ILF2, ILF3 or STRBP were blotted for ADAR1, ADAR2 and GAPDH as a control.  
 1055 The protein levels of ADAR1 and ADAR2 are not greatly changed in wildtype or HEK293T A2 OE cells.  
 1056



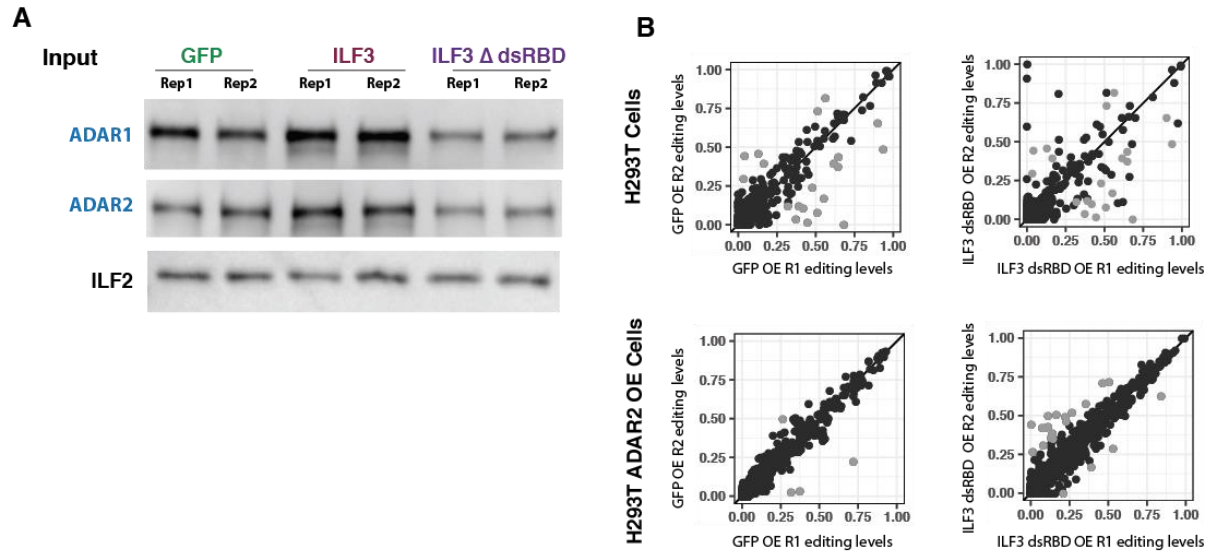

1057  
1058  
1059  
1060  
1061  
1062  
1063  
1064  
1065  
1066

**Figure S9. Biological replicates of cells overexpressing ILF3 and ILF3 dsRBD show consistent editing levels.** **A.** Scatterplots of biological replicates assayed by mmPCR-seq from HEK293T (top row) and HEK293T A2 OE (bottom row) overexpressing GFP or ILF3 dsRBD (from Figure 5C). **B.** Inputs of IPs from Figure 5D.

1067 **LIST OF SUPPLEMENTARY TABLES**

1068

1069 **Supplementary Table 1. mmPCR-seq of HEK293T and HEK293T Adar2 overexpression with**  
1070 **overexpression of ILF2, ILF3, ILF3dsRBD, and STRBP editing levels and p-values for comparison**  
1071 **with GFP overexpression controls.**

1072

1073 **Supplementary Table 2. RNA-seq of HEK293T and HEK293T Adar2 overexpression with ILF3**  
1074 **overexpression editing levels and p-values for comparison with GFP overexpression controls.**

1075

1076

1077
